# Supplementary material for: Highly efficient and generalized asymmetric synthesis of quaternary stereogenic carbon-containing β-amino indanones/indanoles via Mannich-type additions between 1-indanones and N-tert-butanesulfinylketimines
Source: Royal Society of Chemistry journal article supplement (doi:10.1039/c4ob00489b), 2014-01-01

## *Supporting Information*

**Highly efficient and generalized asymmetric synthesis of quaternary  
stereogenic carbon-containing  $\beta$ -amino indanones/indanoles *via*  
Mannich-type additions between 1-indanones and  
*N*-*tert*-butanesulfinylketimines**

**Lingmin Wu,<sup>a</sup> Chen Xie,<sup>a</sup> Haibo Mei,<sup>a</sup> Jianlin Han,<sup>\*a</sup> Vadim A. Soloshonok<sup>b,c</sup>  
and Yi Pan<sup>a</sup>**

# NMR spectra of compounds 3, 4 and 5

$^1\text{H}$  NMR and  $^{13}\text{C}$  NMR spectrum of 3a

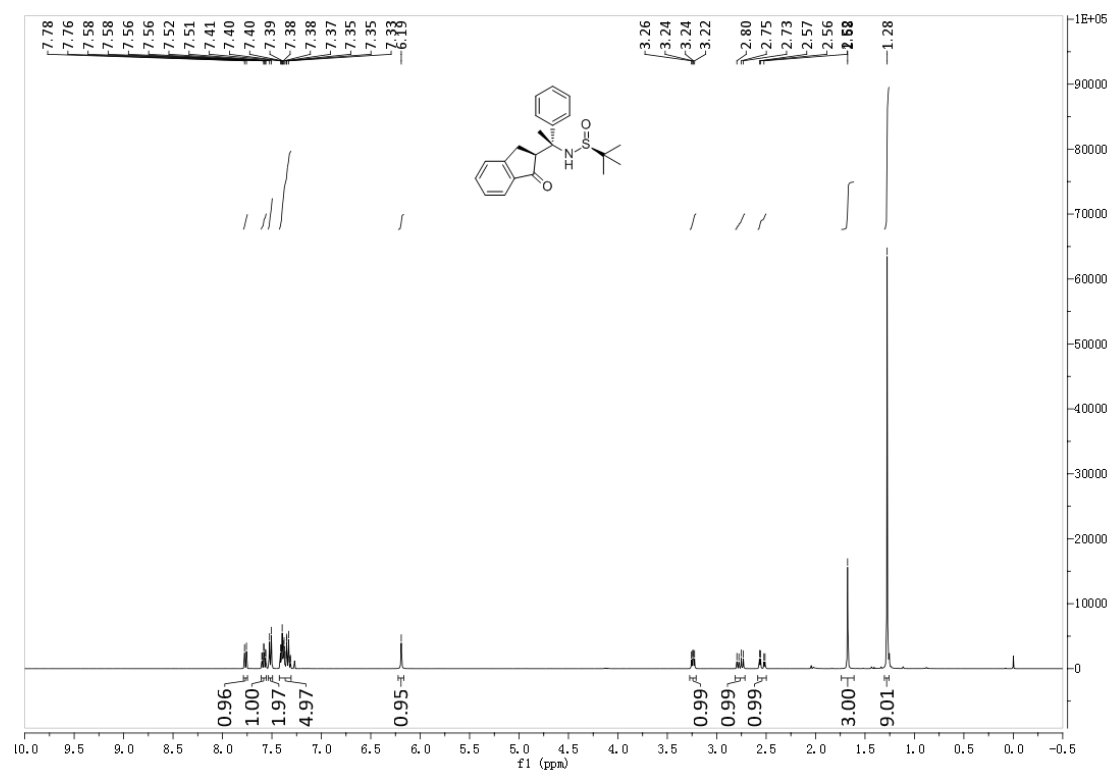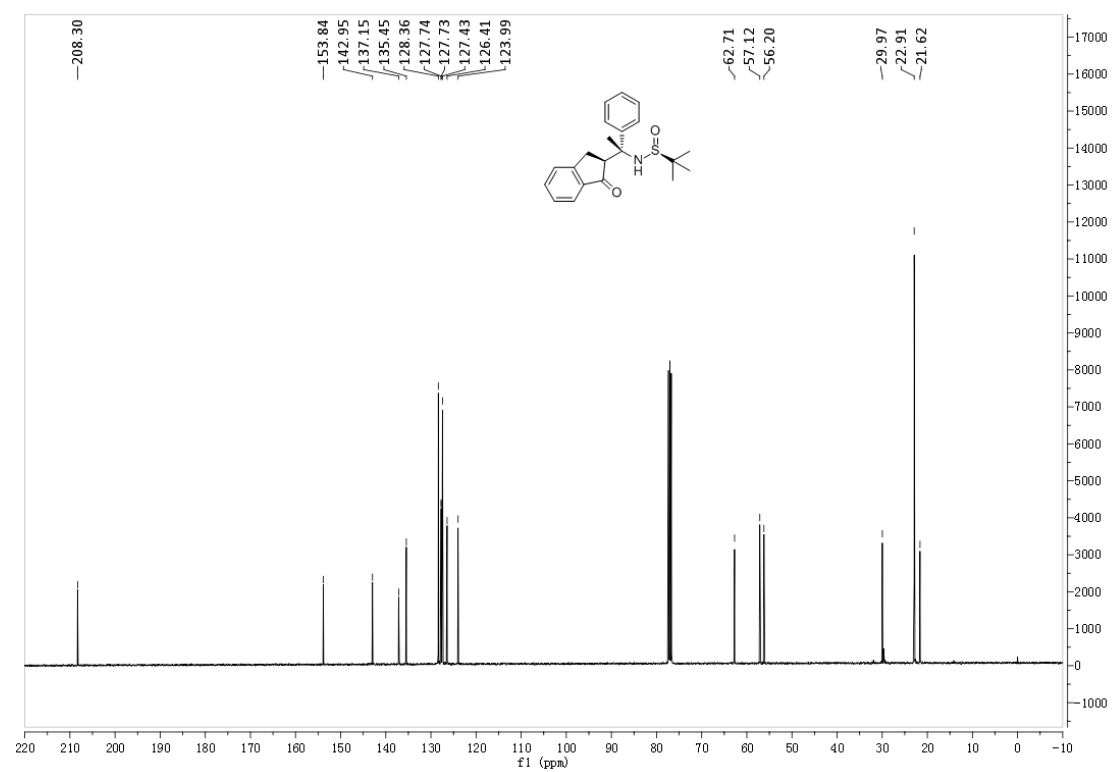

$^1\text{H}$  NMR and  $^{13}\text{C}$  NMR spectrum of **3a'**

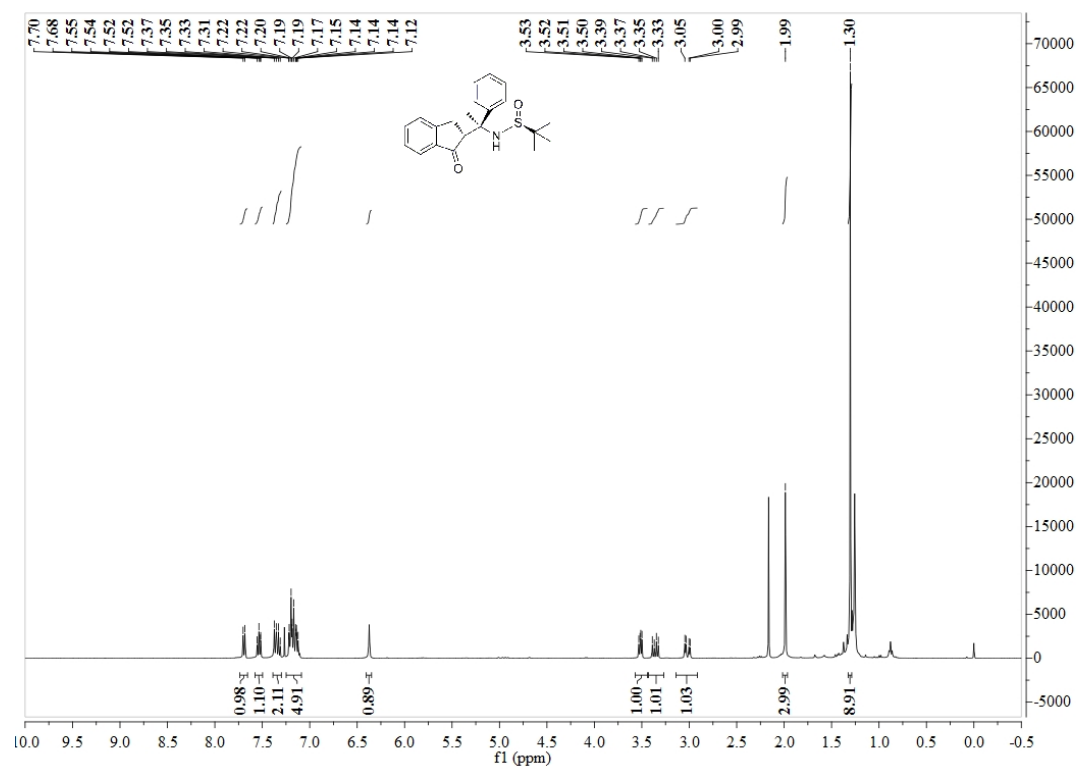

$^1\text{H}$  NMR and  $^{13}\text{C}$  NMR spectrum of **3b**

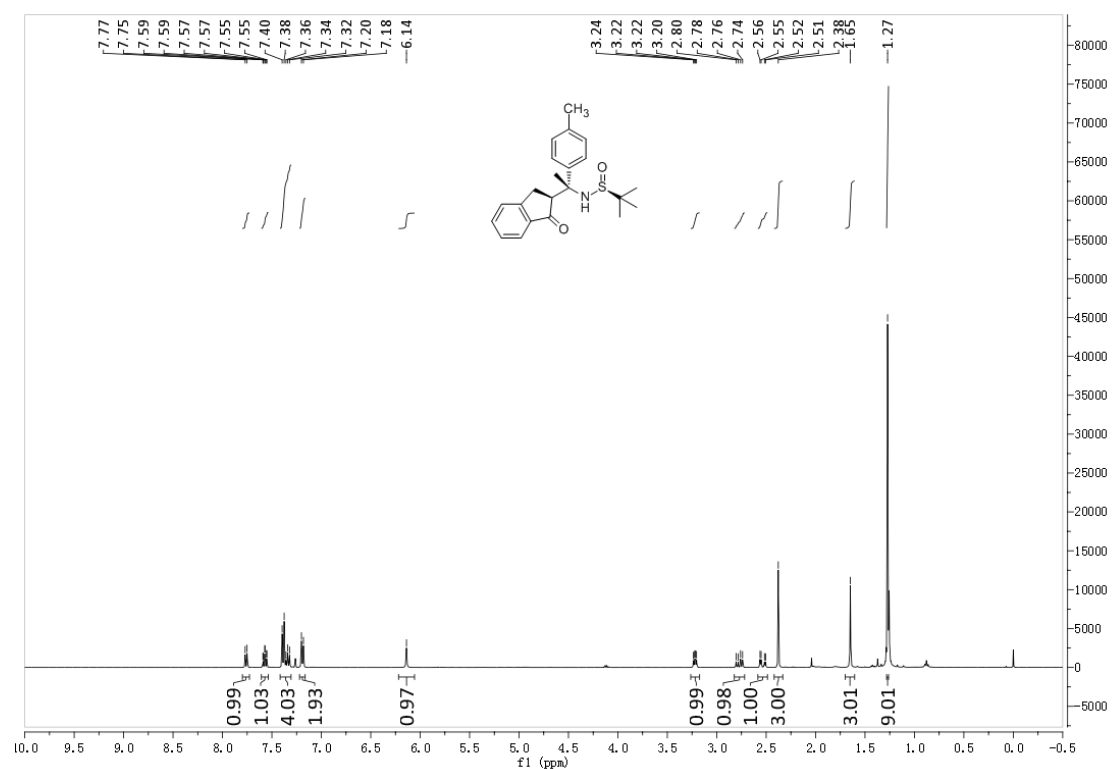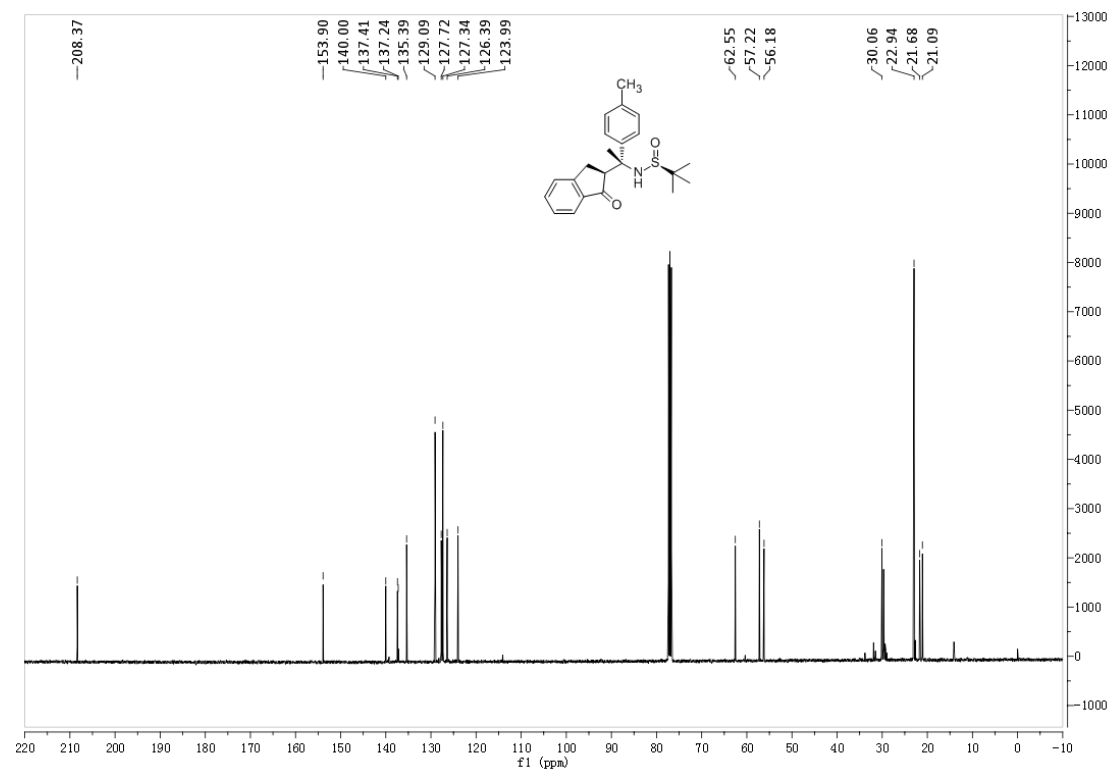

$^1\text{H}$  NMR and  $^{13}\text{C}$  NMR spectrum of **3c**

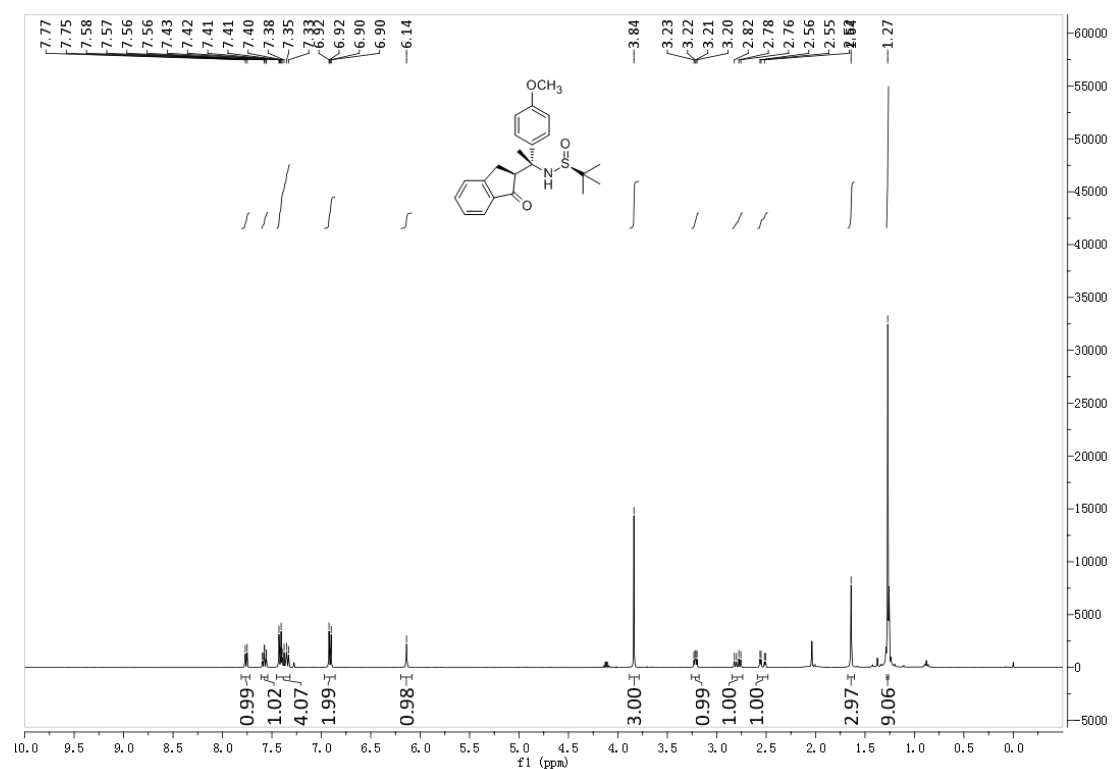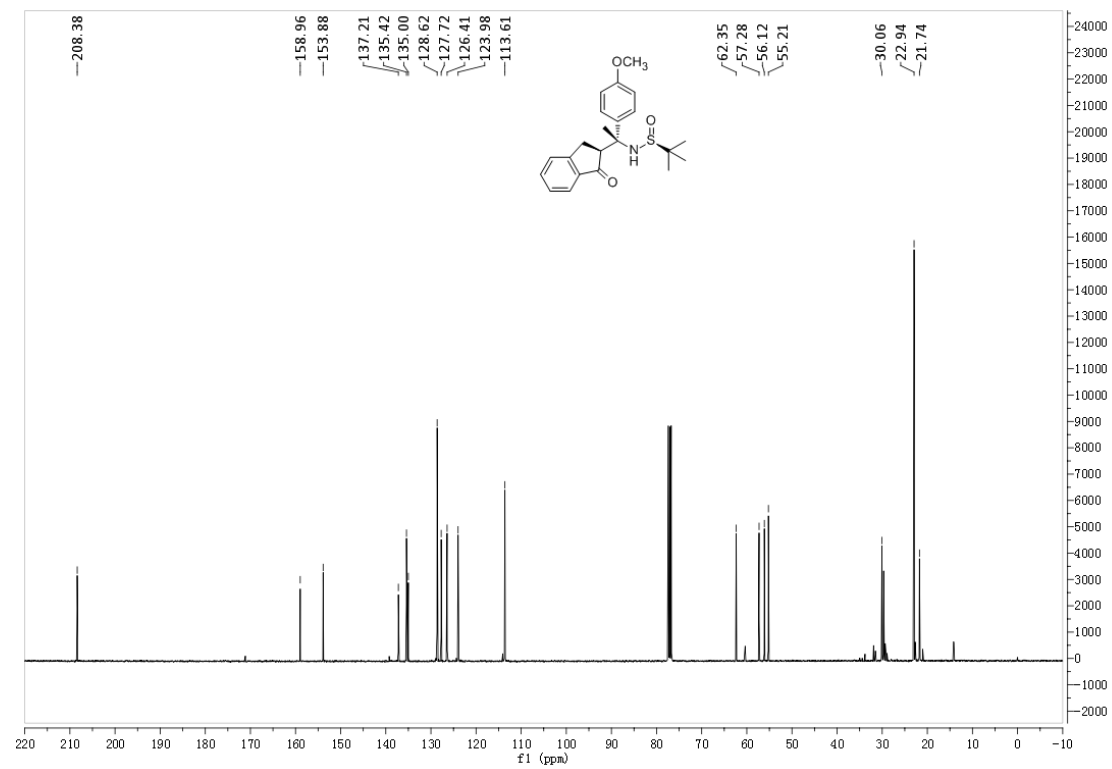

$^1\text{H}$  NMR and  $^{13}\text{C}$  NMR spectrum of **3d**

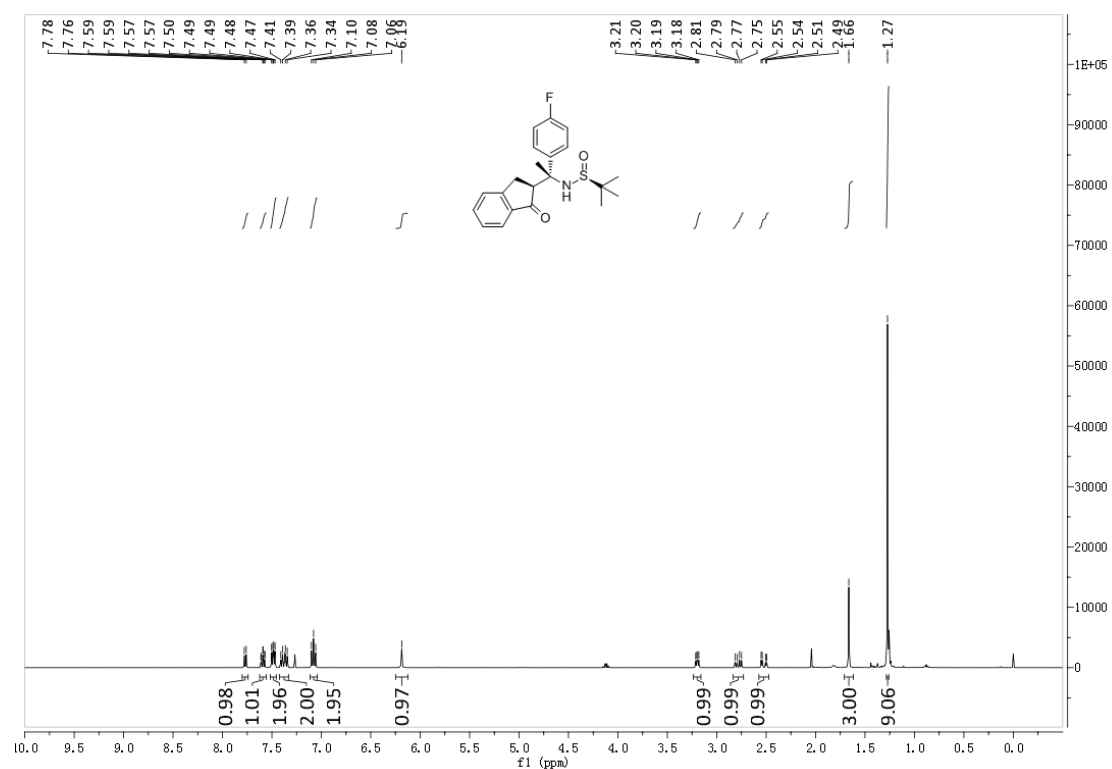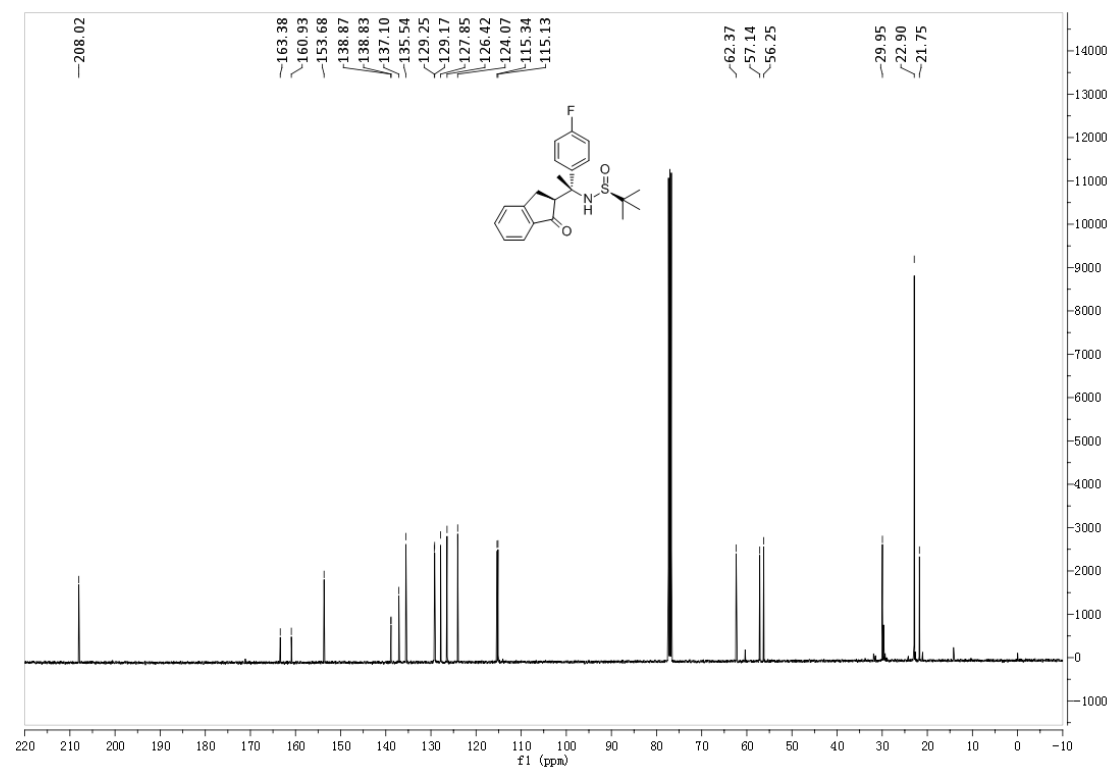

$^1\text{H}$  NMR and  $^{13}\text{C}$  NMR spectrum of **3e**

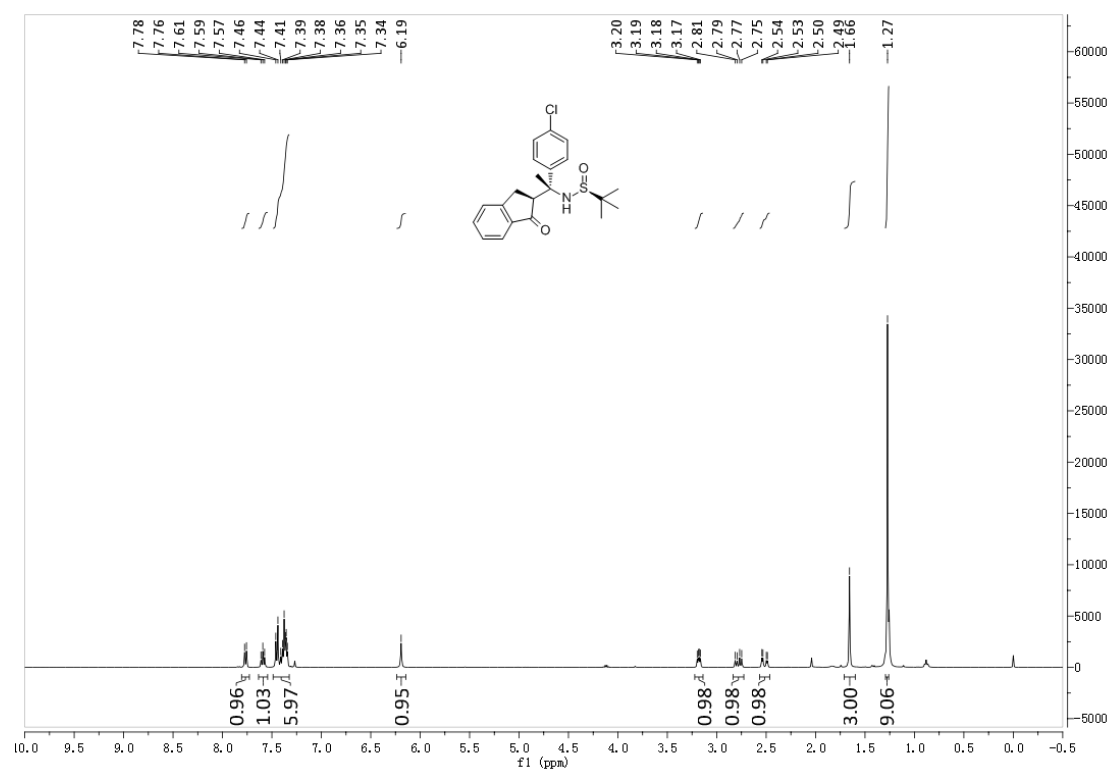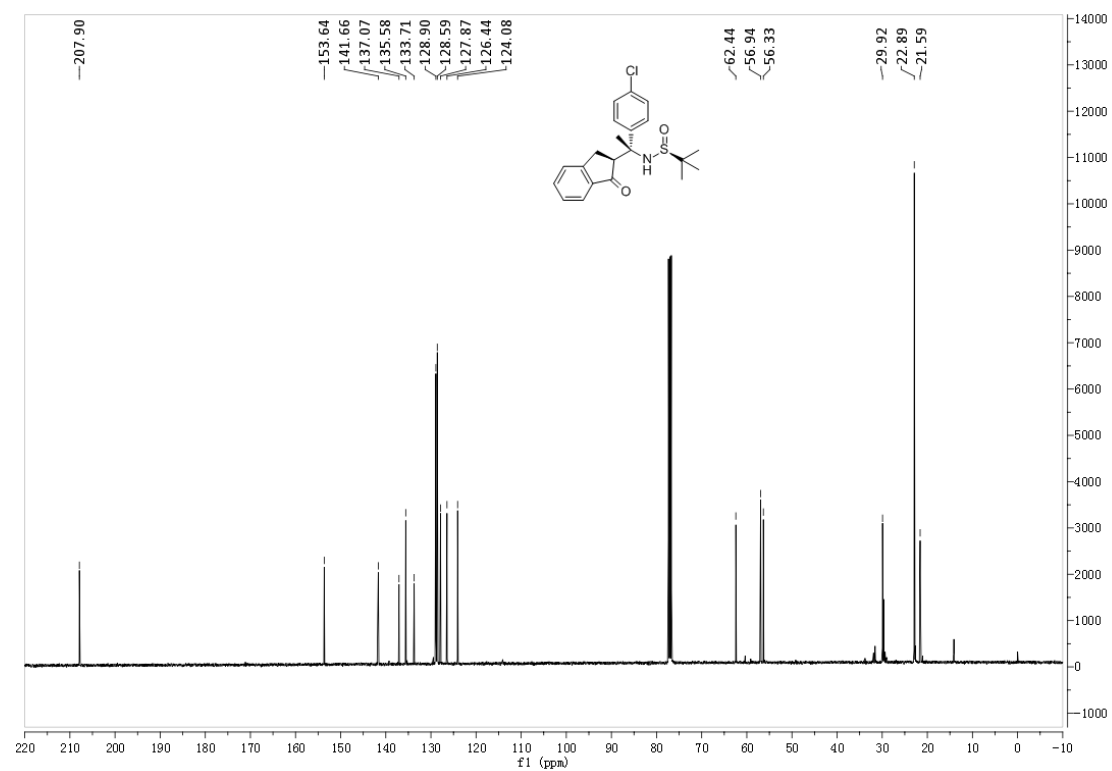

$^1\text{H}$  NMR and  $^{13}\text{C}$  NMR spectrum of **3f**

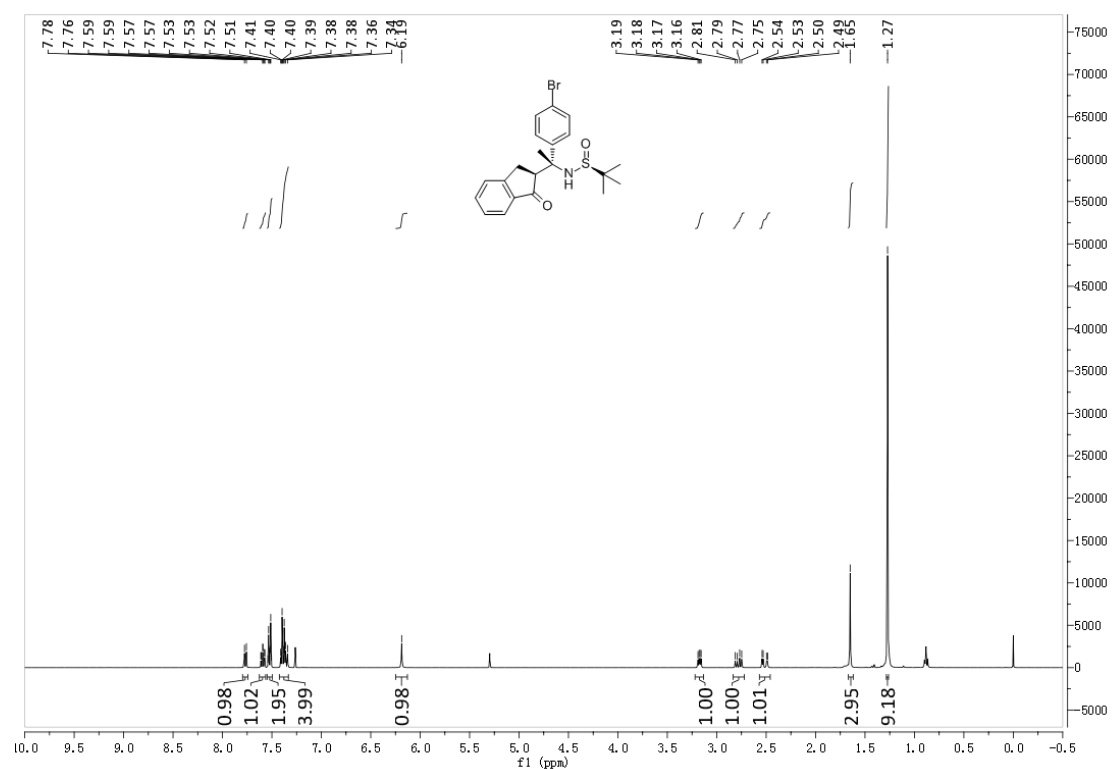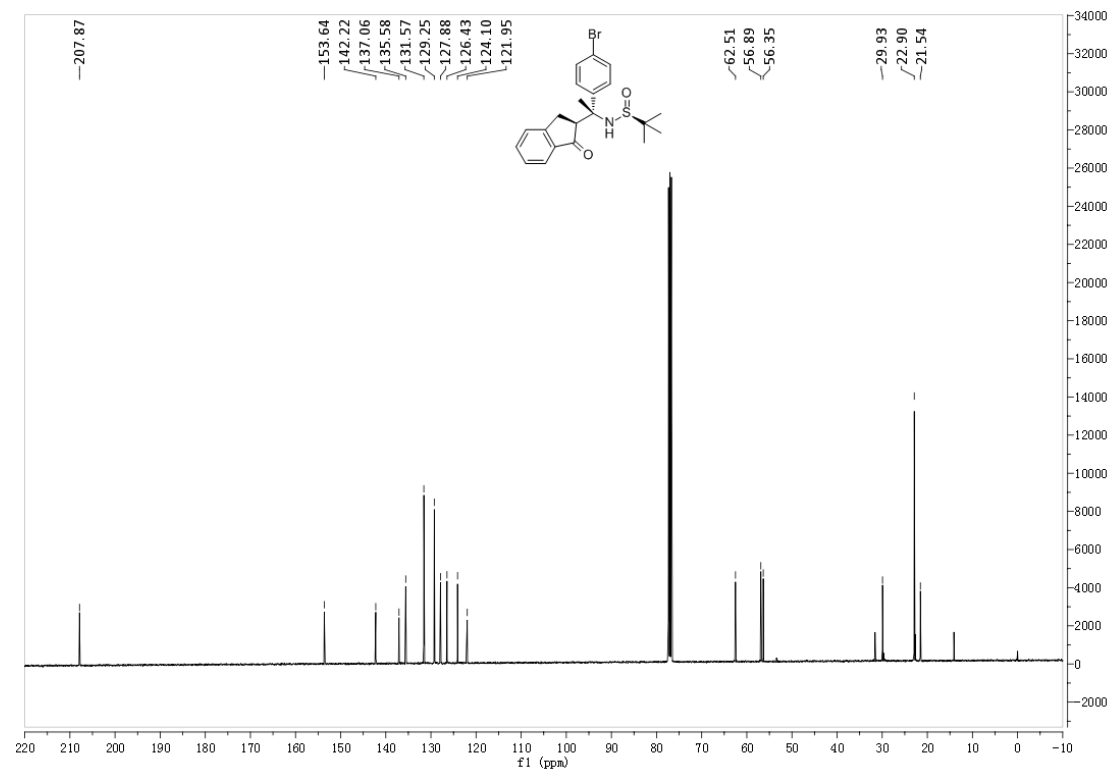



$^1\text{H}$  NMR and  $^{13}\text{C}$  NMR spectrum of **3g**

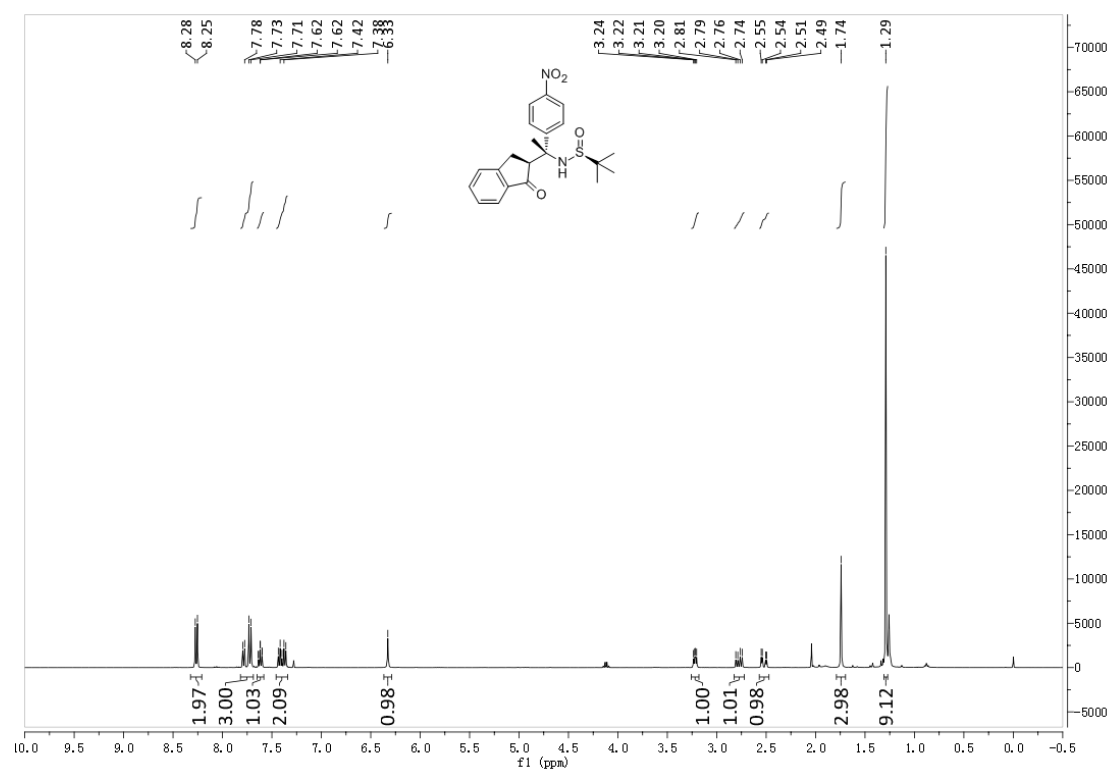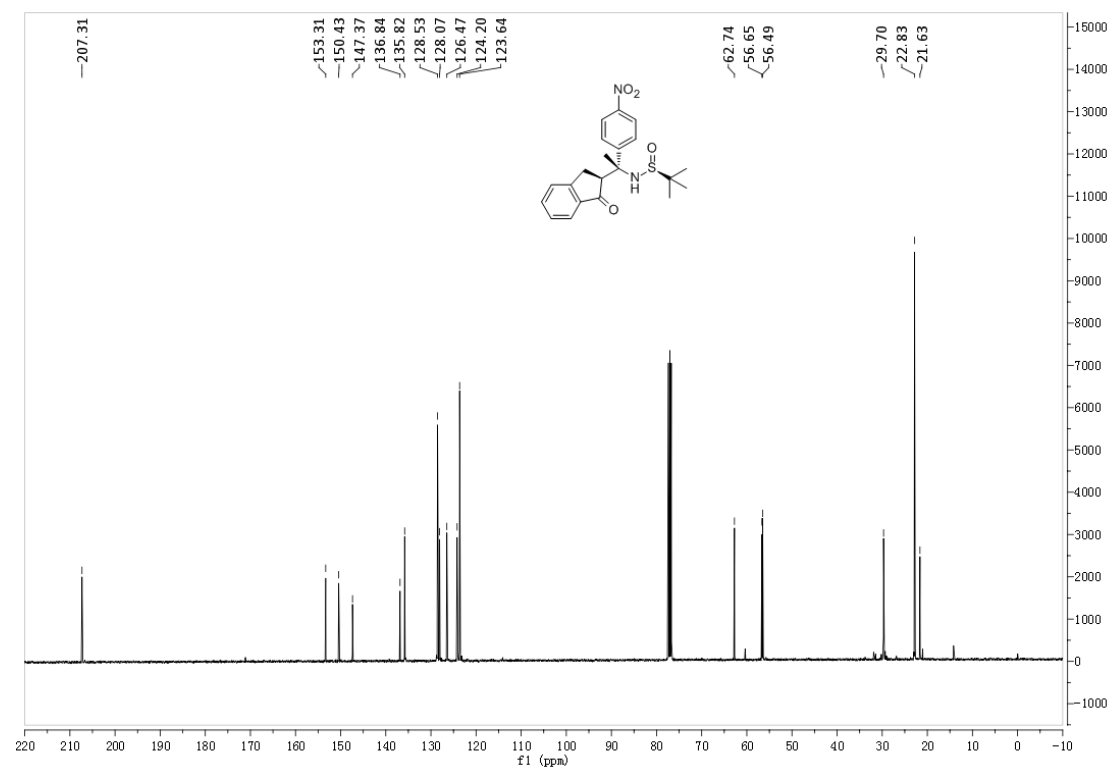

$^1\text{H}$  NMR and  $^{13}\text{C}$  NMR spectrum of **3h**

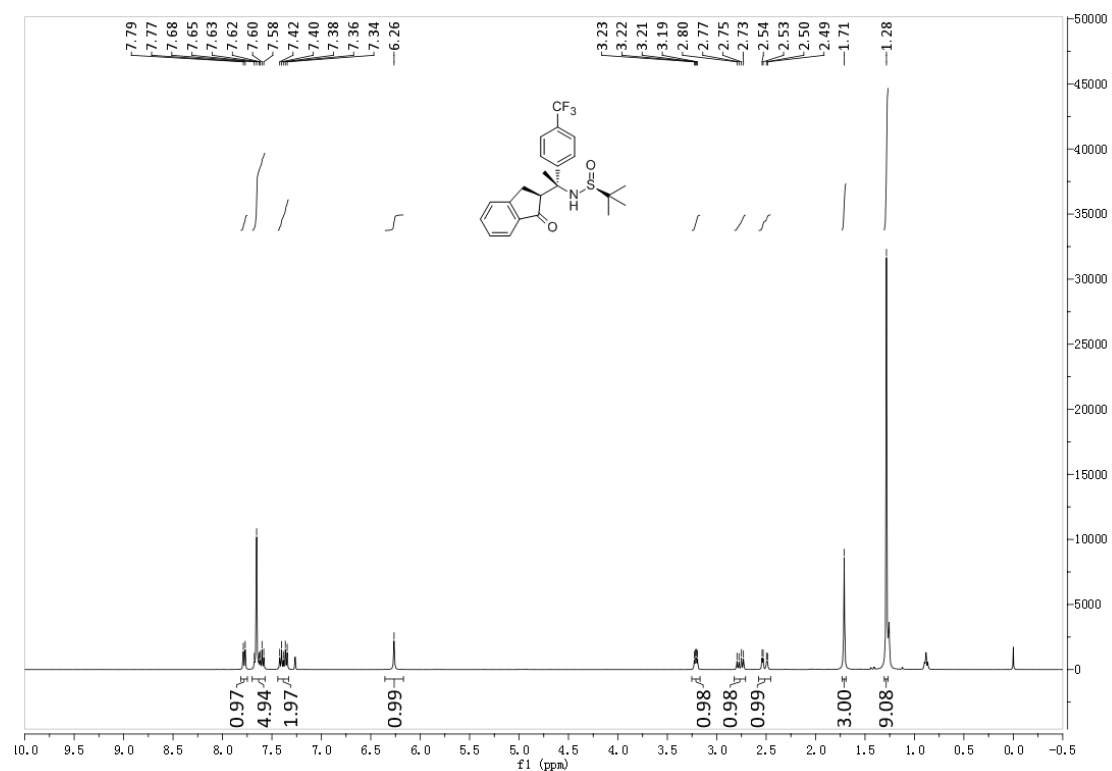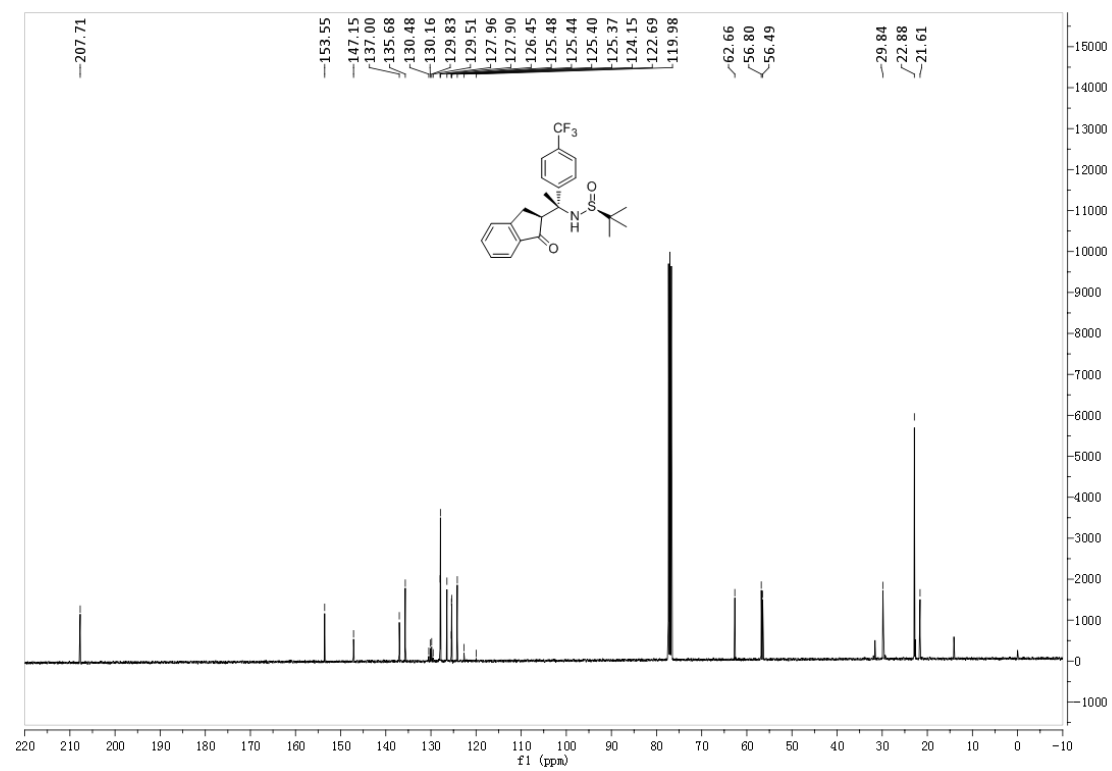

$^1\text{H}$  NMR and  $^{13}\text{C}$  NMR spectrum of **3i**

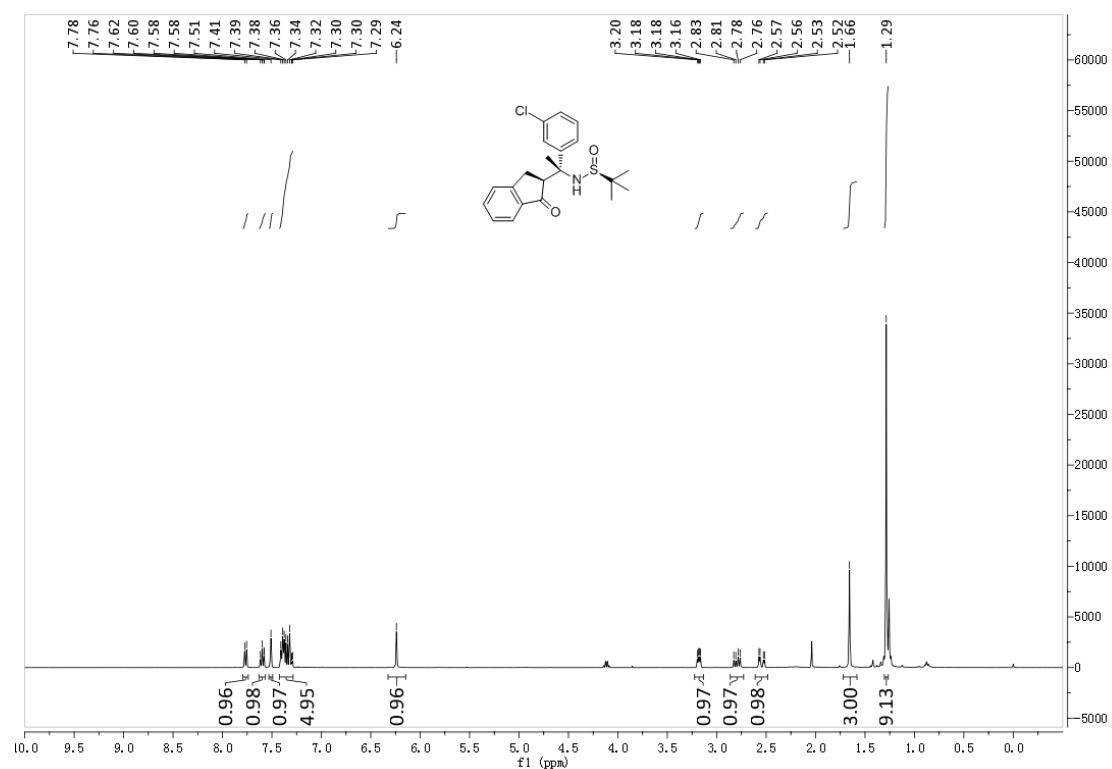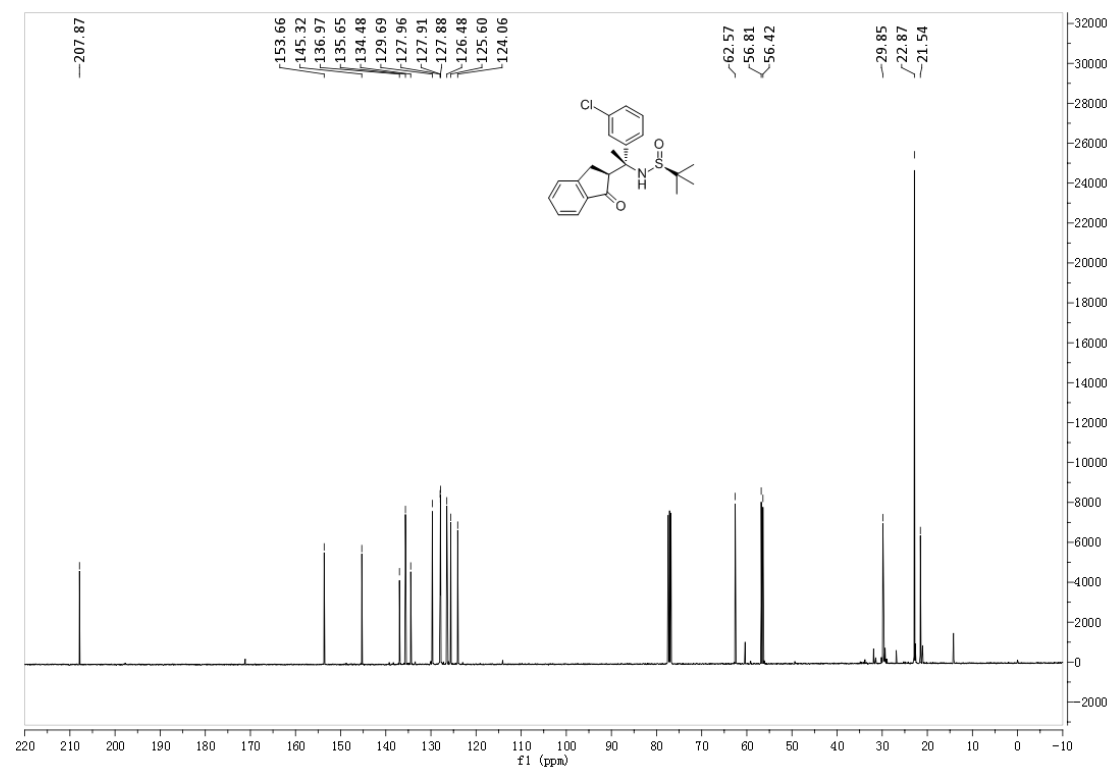

$^1\text{H}$  NMR and  $^{13}\text{C}$  NMR spectrum of **3j**

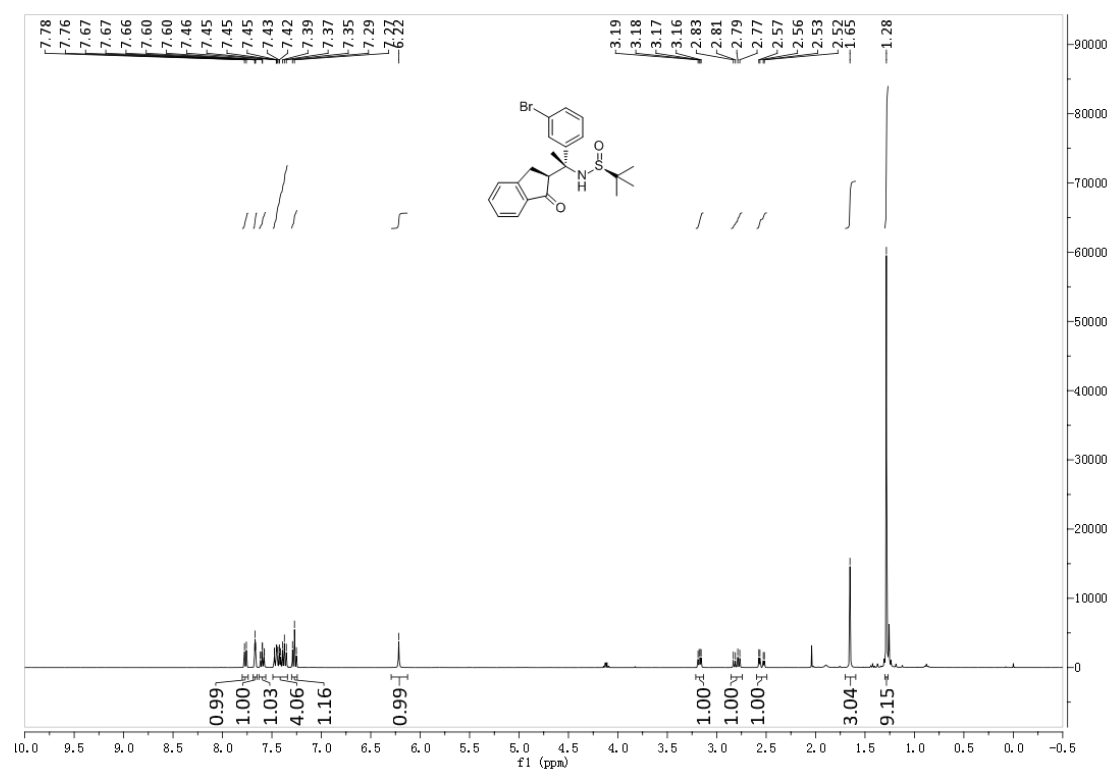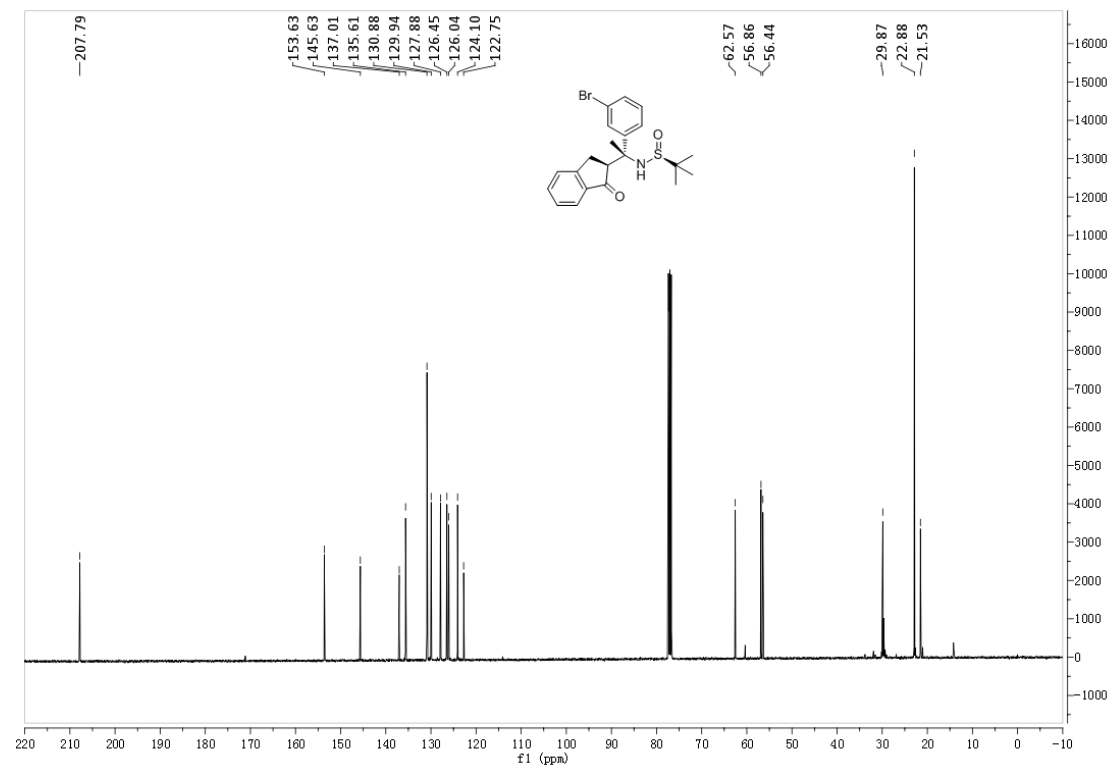

$^1\text{H}$  NMR and  $^{13}\text{C}$  NMR spectrum of **3k**

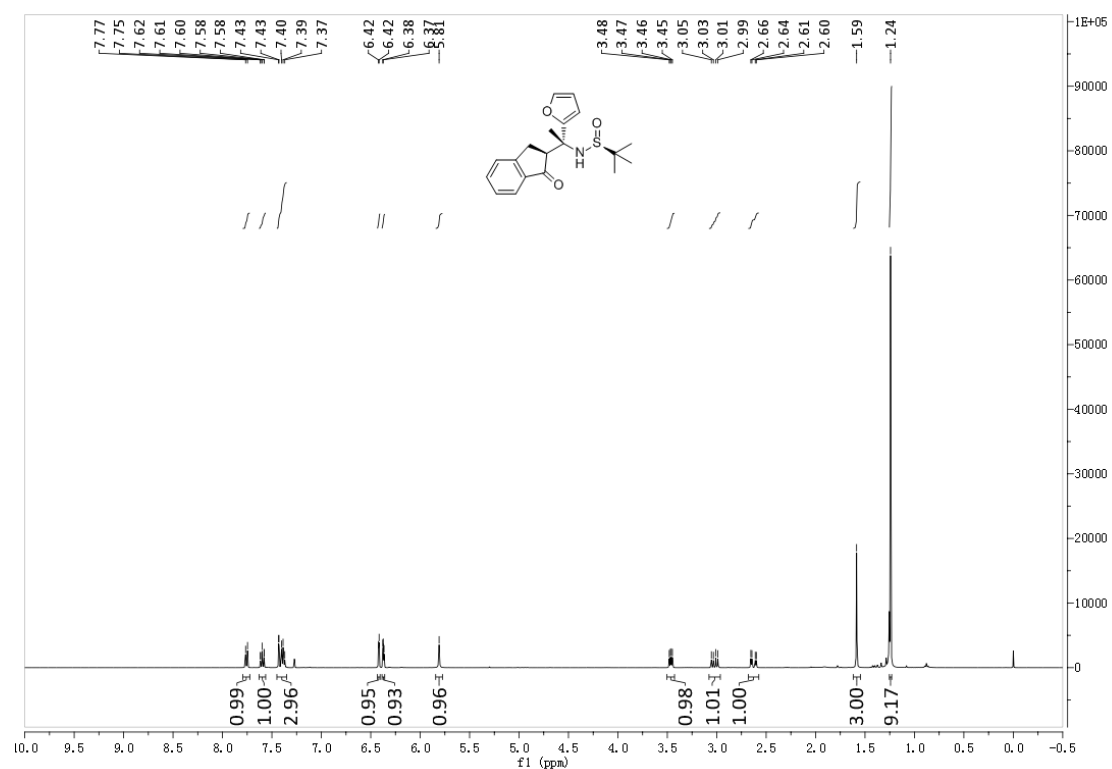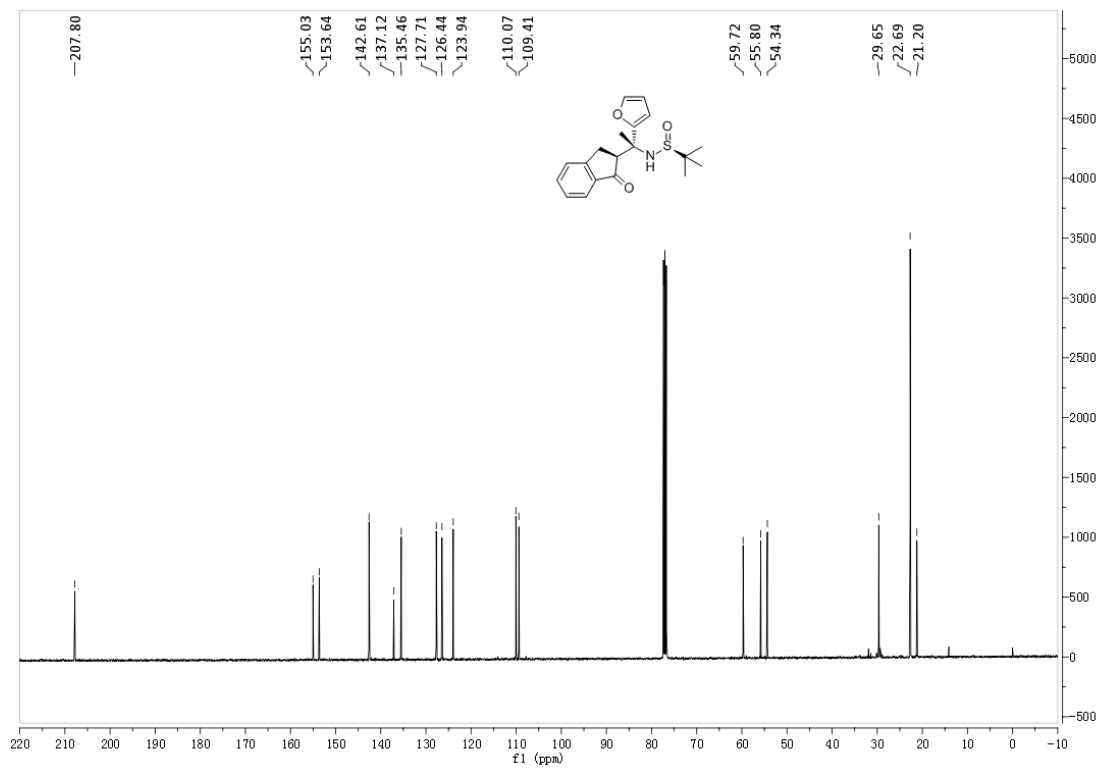

$^1\text{H}$  NMR and  $^{13}\text{C}$  NMR spectrum of **31**

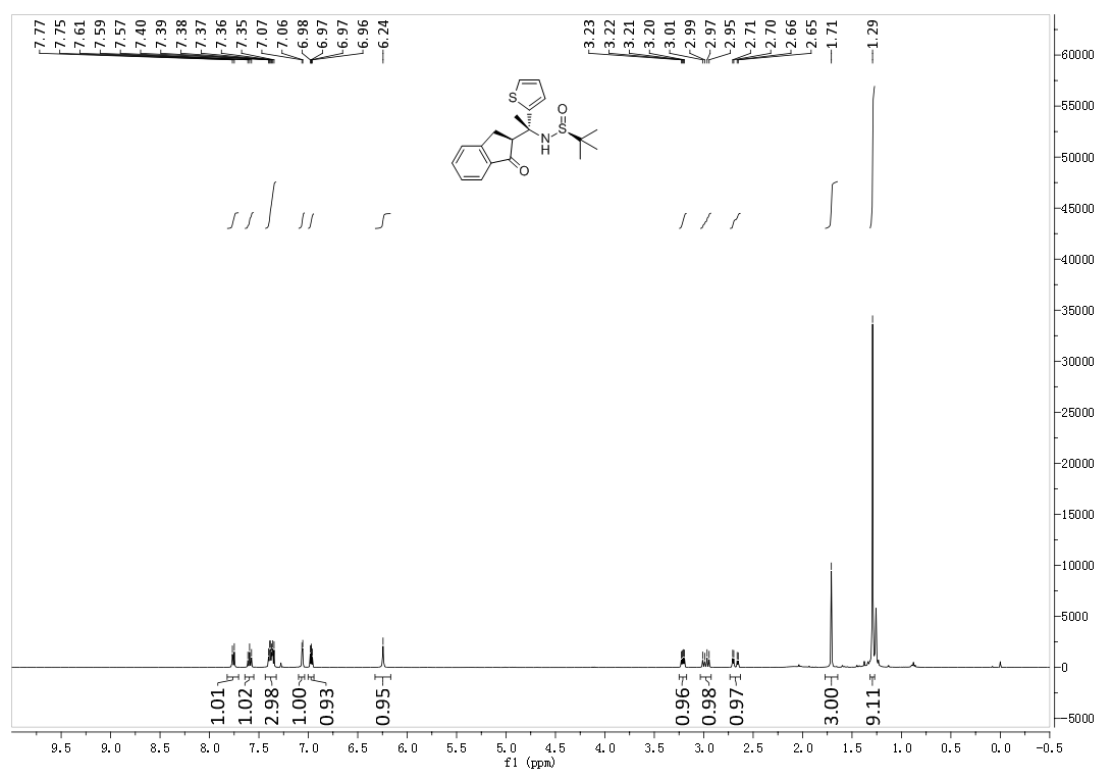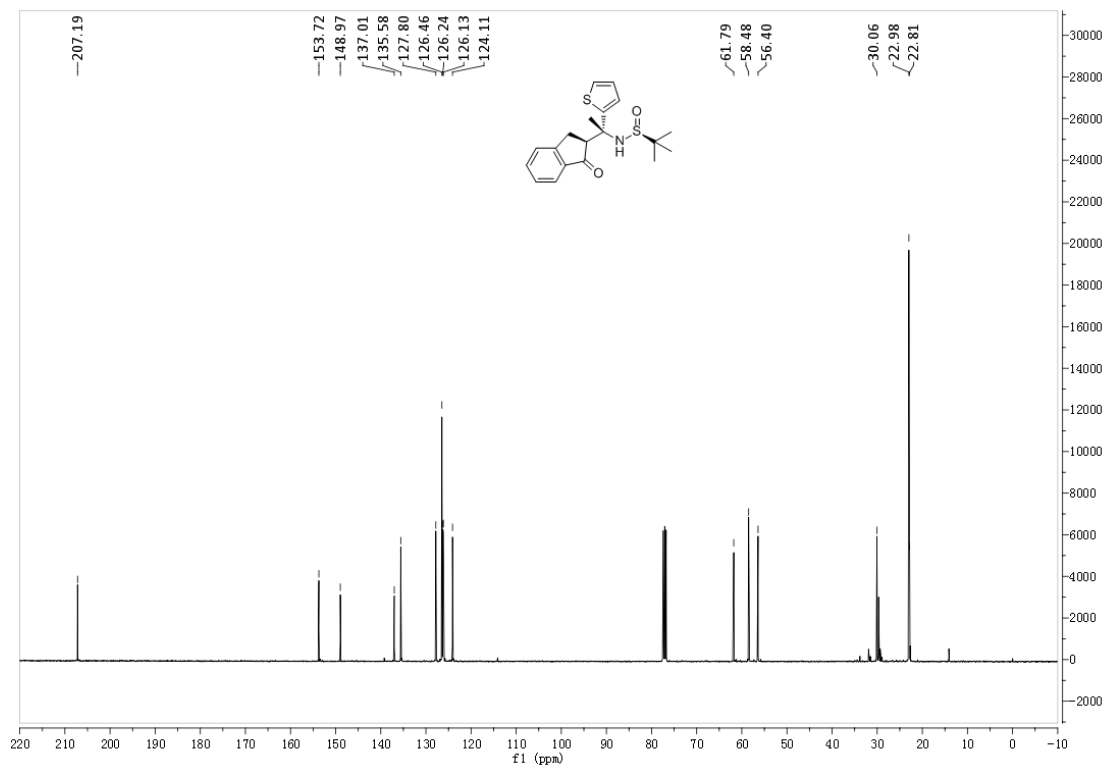

$^1\text{H}$  NMR and  $^{13}\text{C}$  NMR spectrum of **3m**

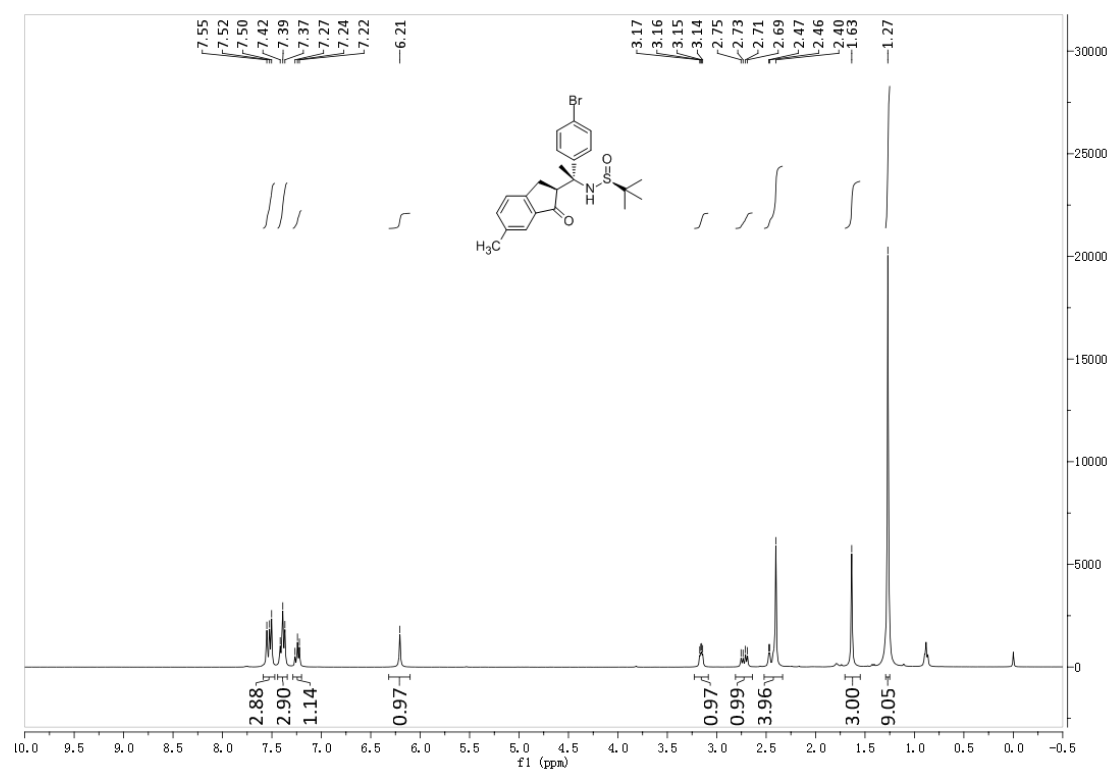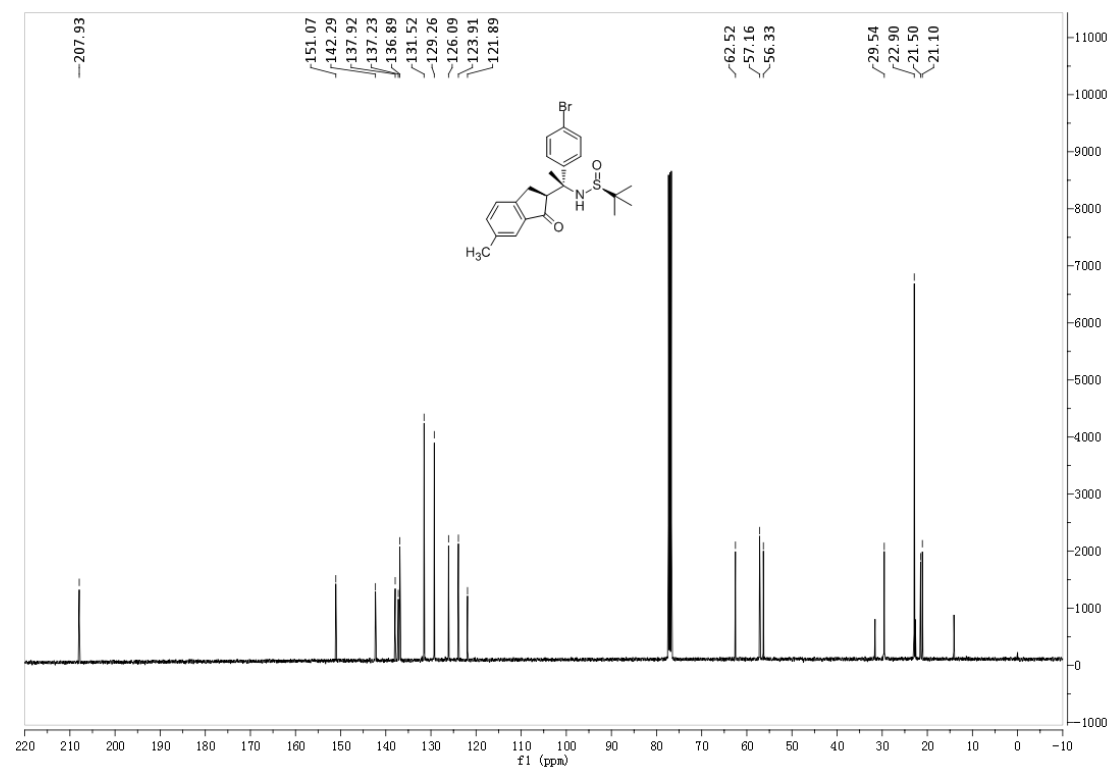

$^1\text{H}$  NMR and  $^{13}\text{C}$  NMR spectrum of **3n**

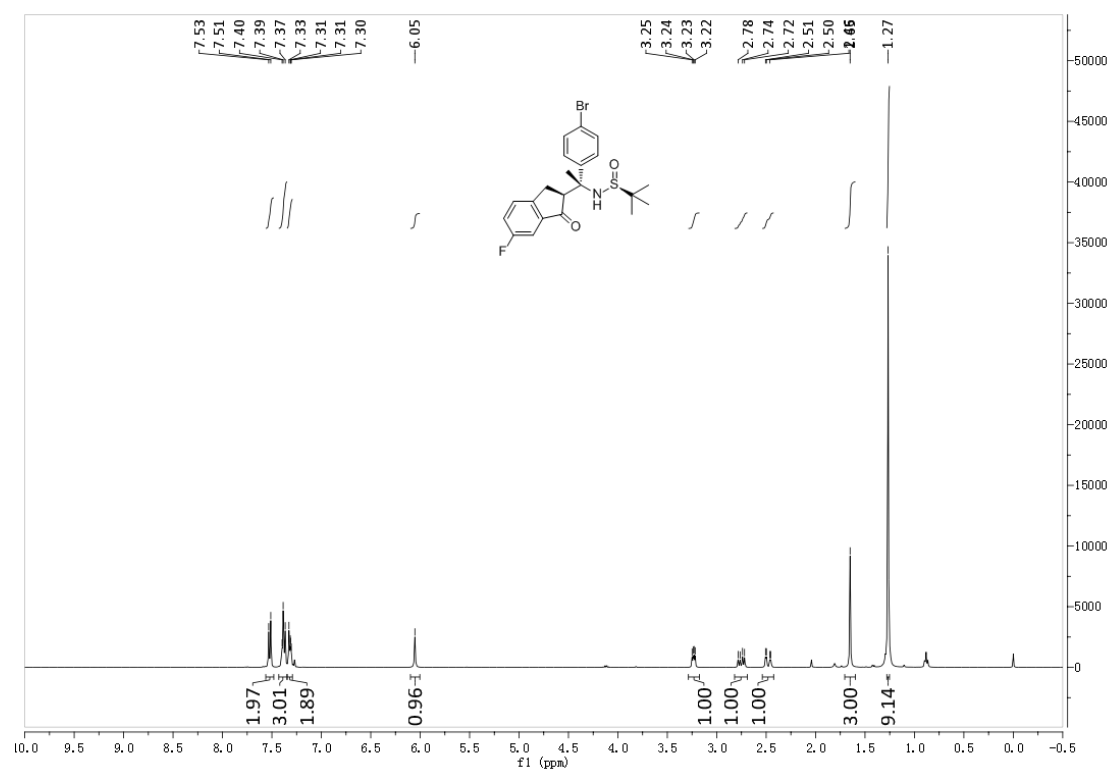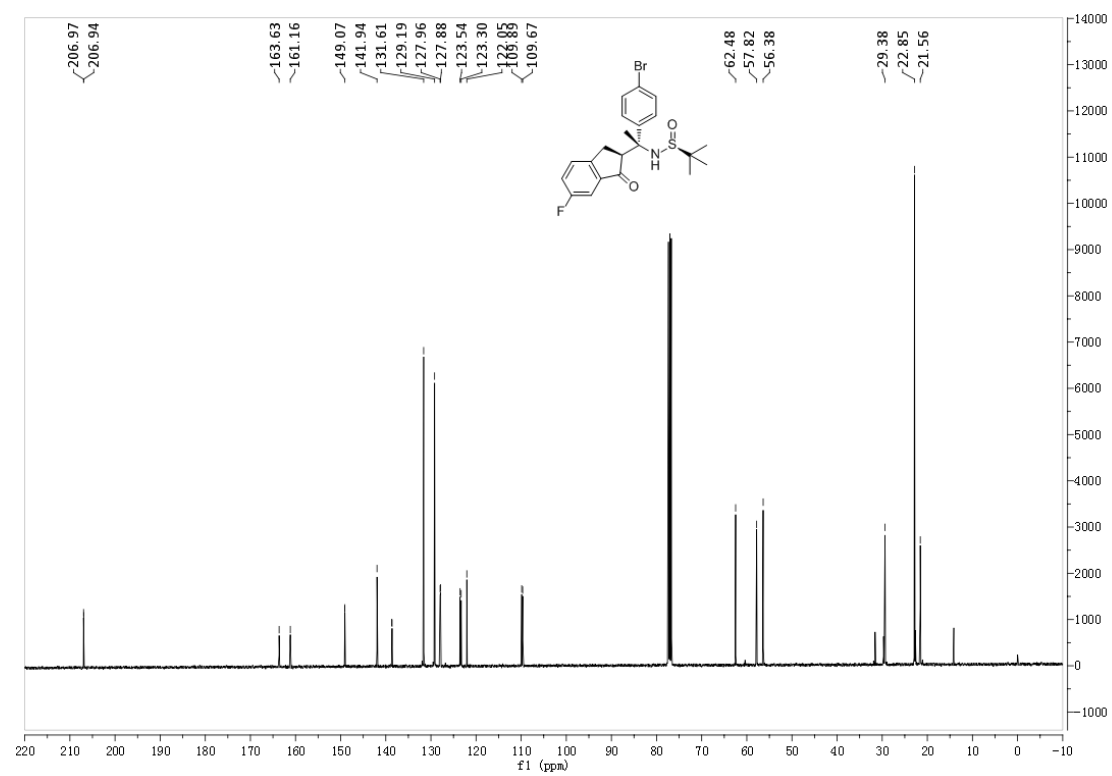



$^1\text{H}$  NMR and  $^{13}\text{C}$  NMR spectrum of **30**

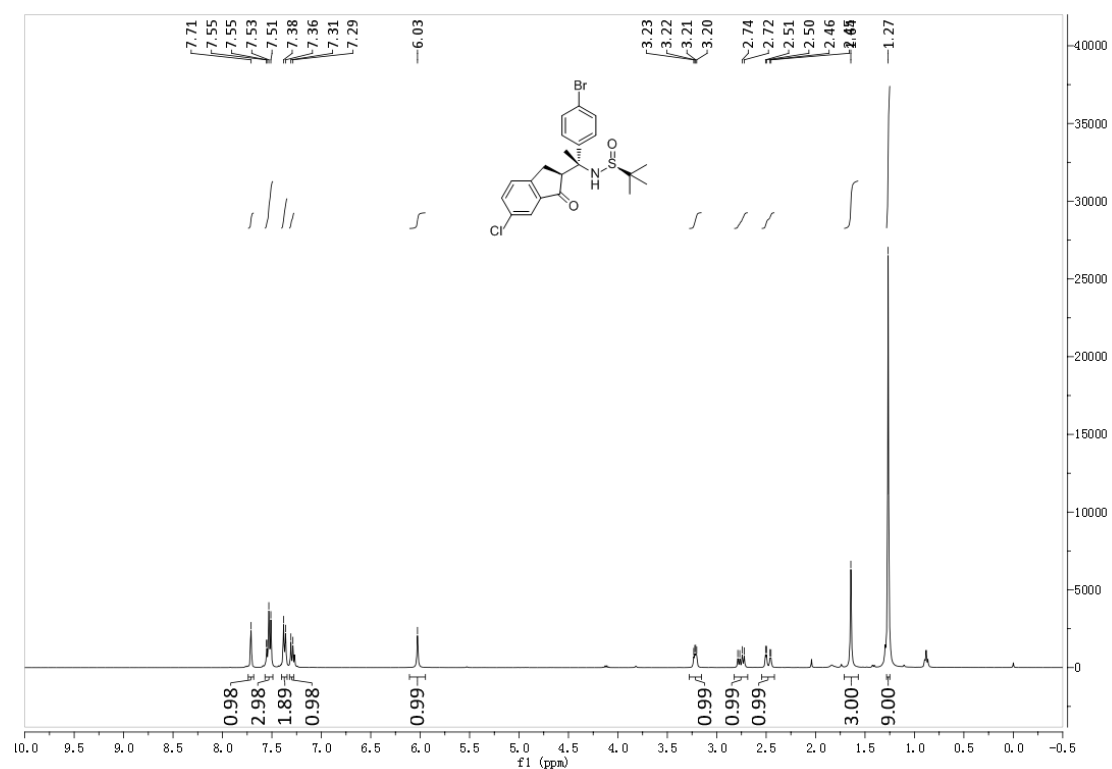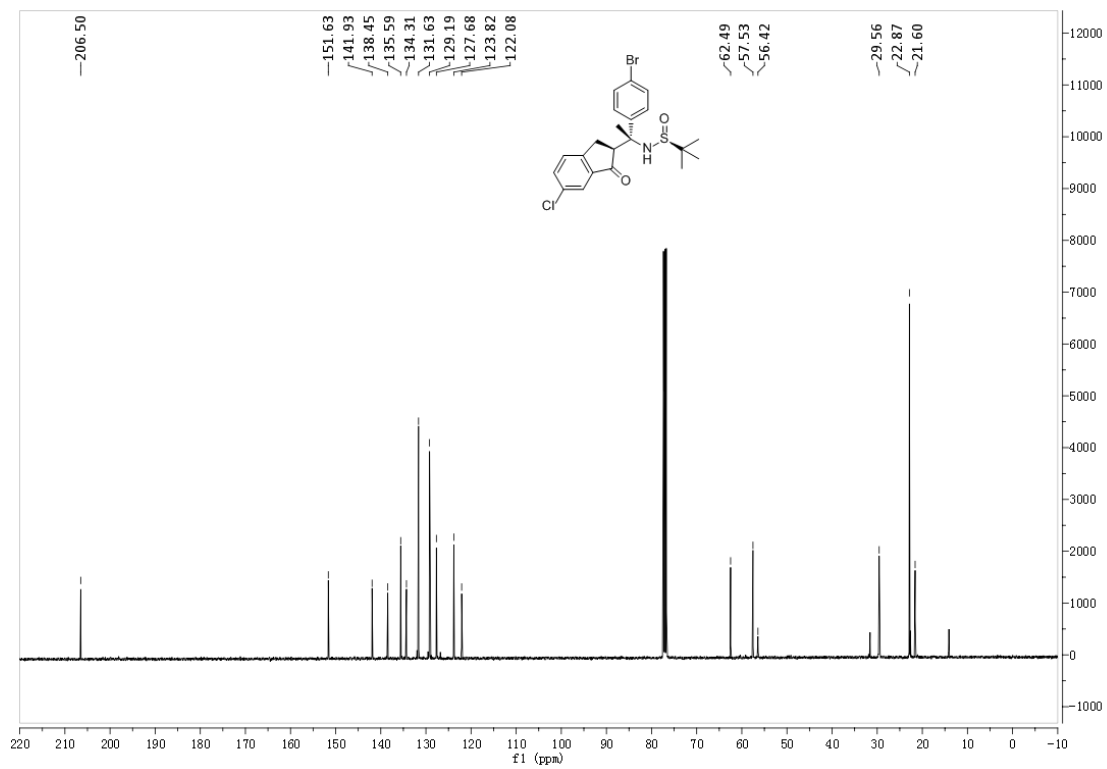

$^1\text{H}$  NMR and  $^{13}\text{C}$  NMR spectrum of **3p**

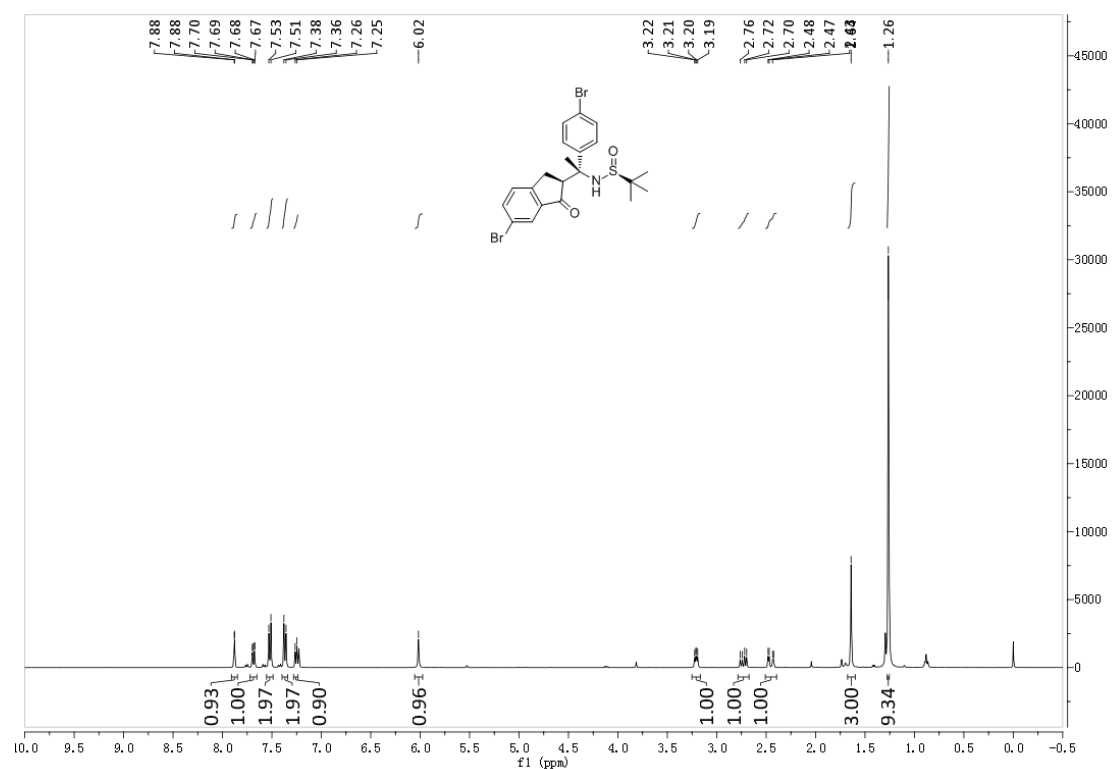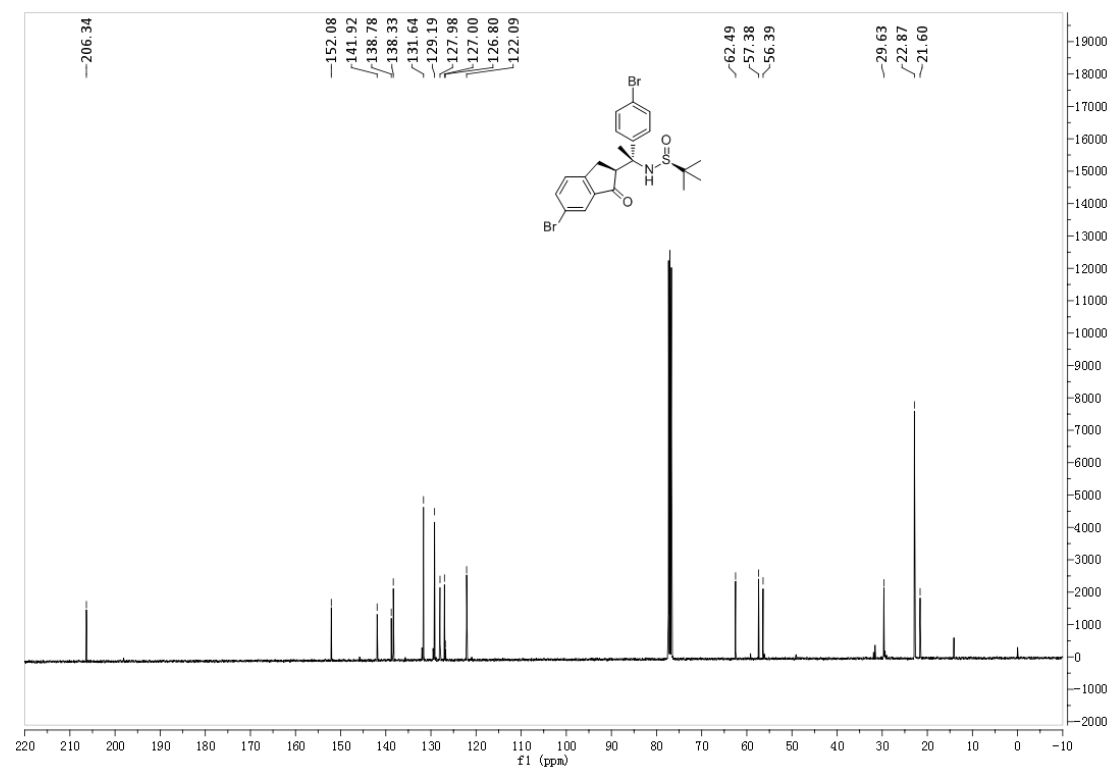

$^1\text{H}$  NMR and  $^{13}\text{C}$  NMR spectrum of **3q**

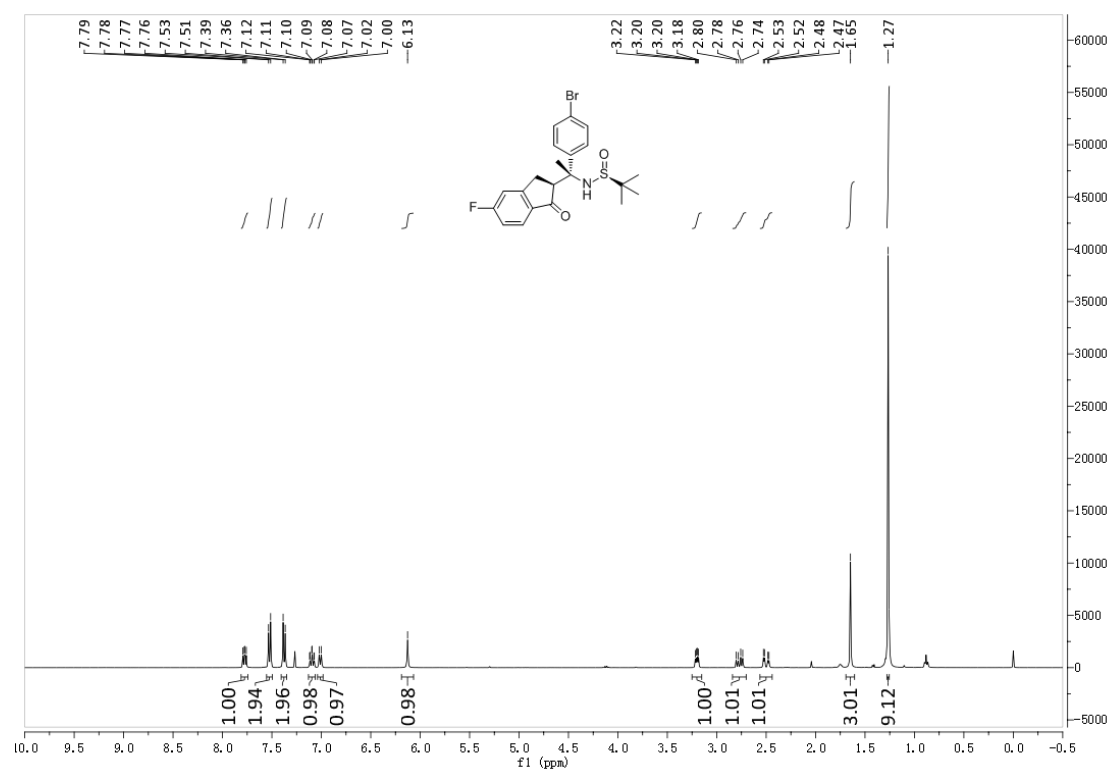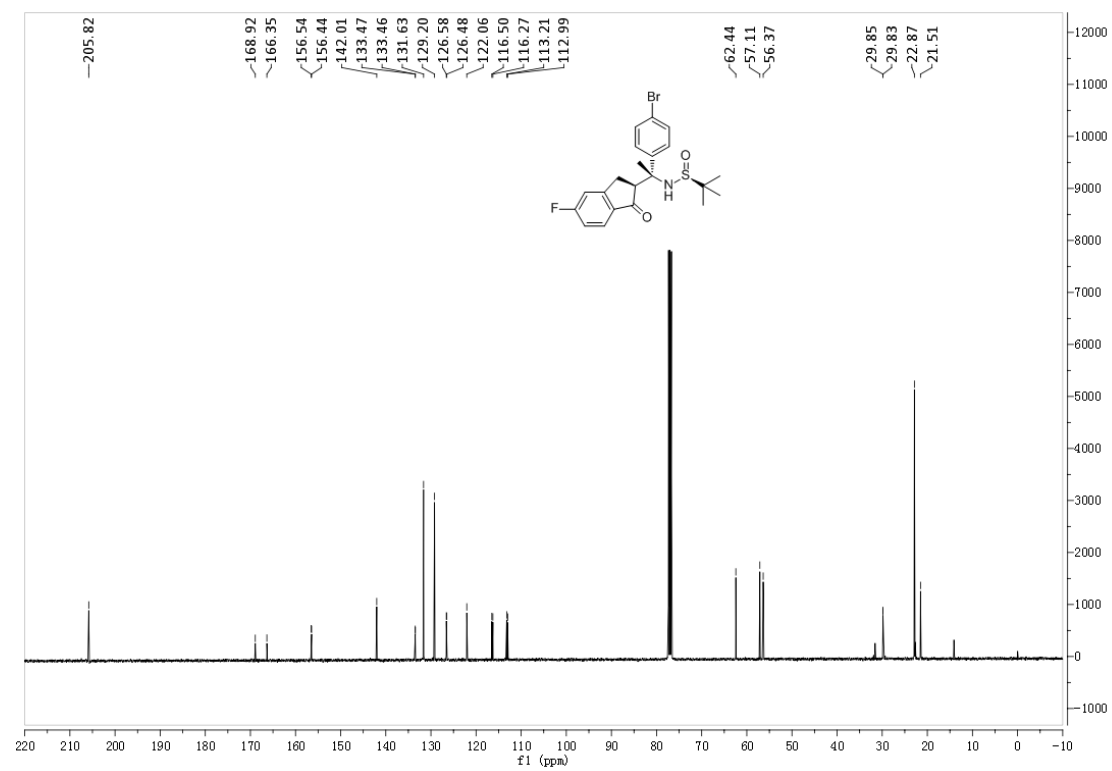

$^1\text{H}$  NMR and  $^{13}\text{C}$  NMR spectrum of **3r**

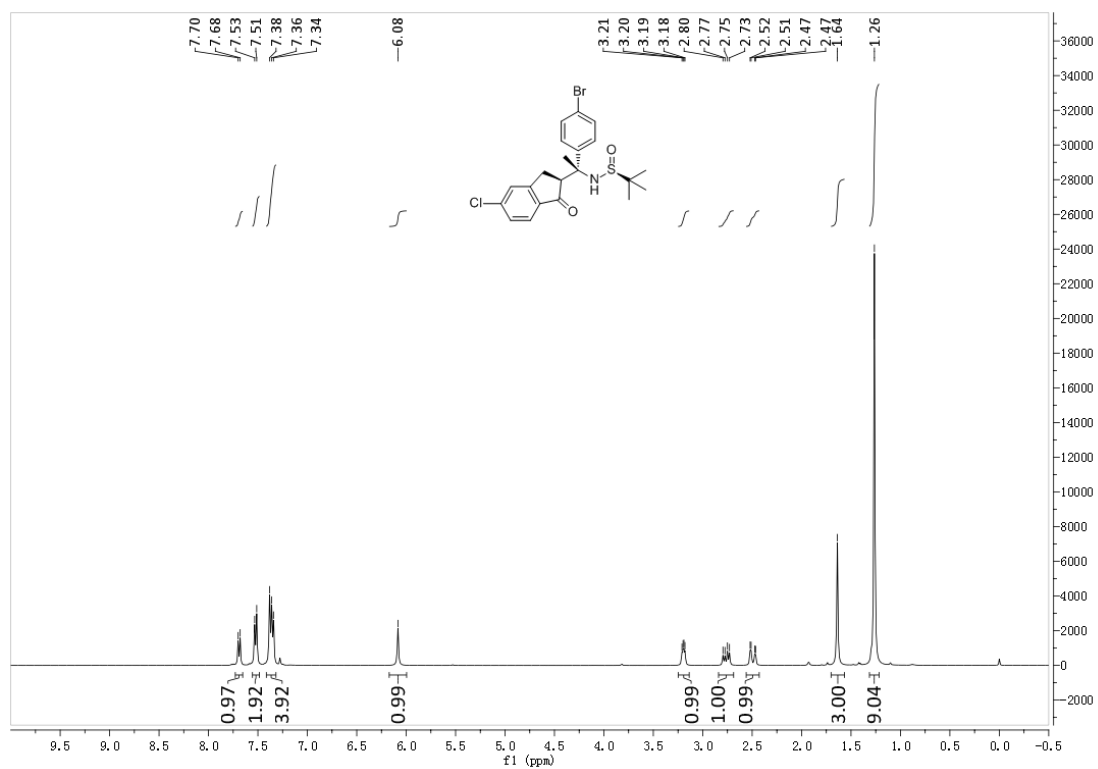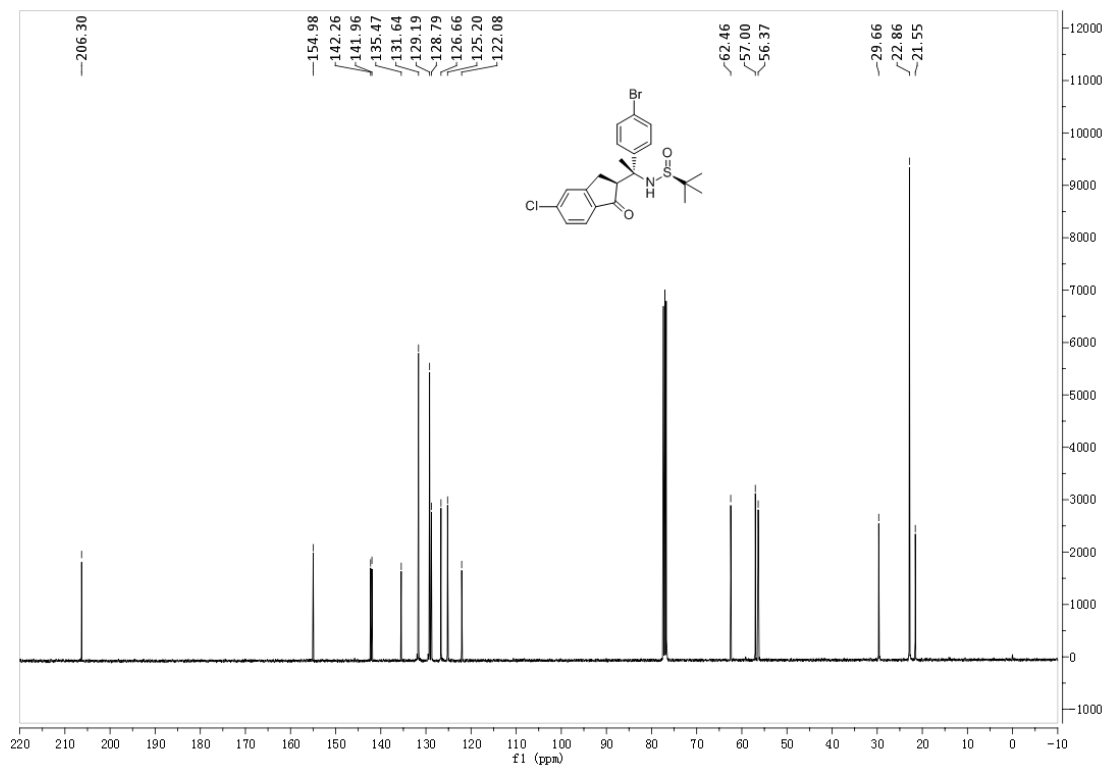

$^1\text{H}$  NMR and  $^{13}\text{C}$  NMR spectrum of **3s**

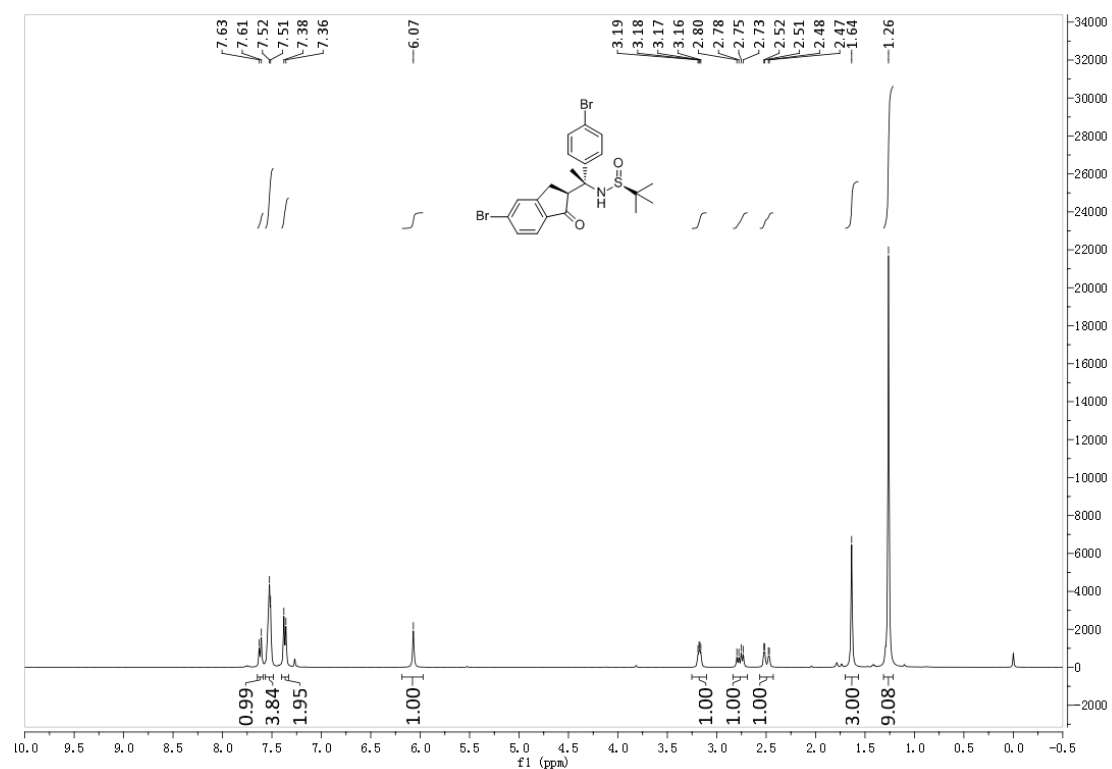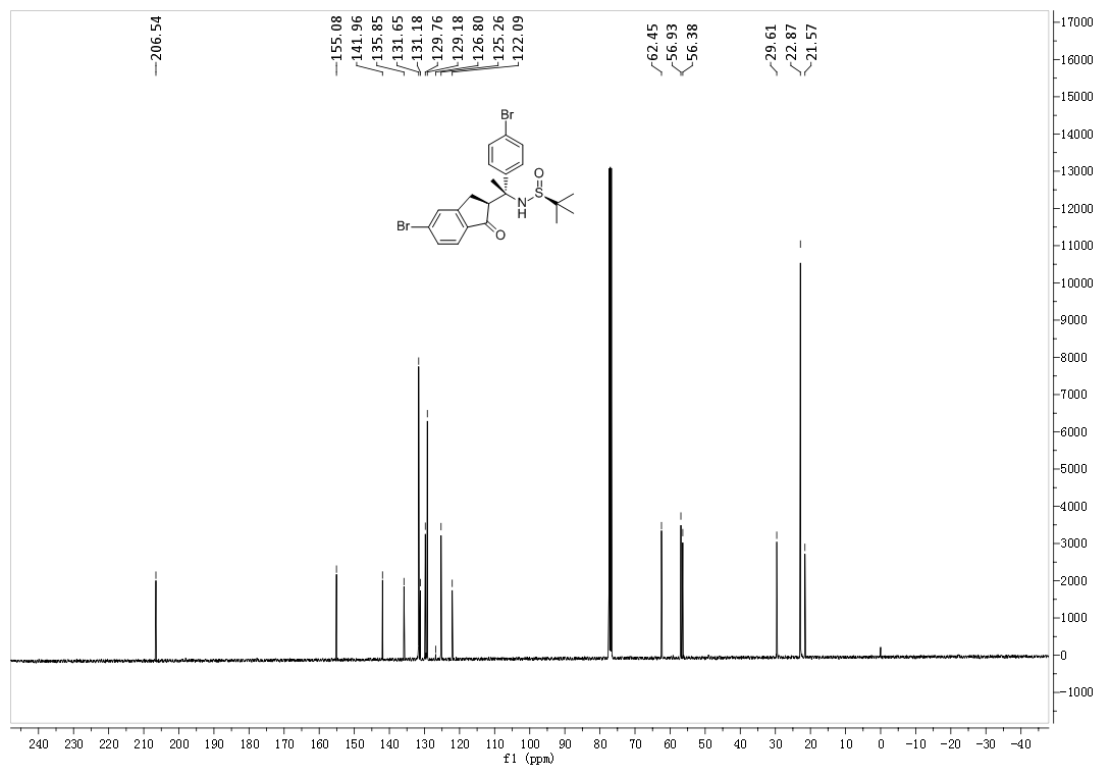

$^1\text{H}$  NMR and  $^{13}\text{C}$  NMR spectrum of **4**

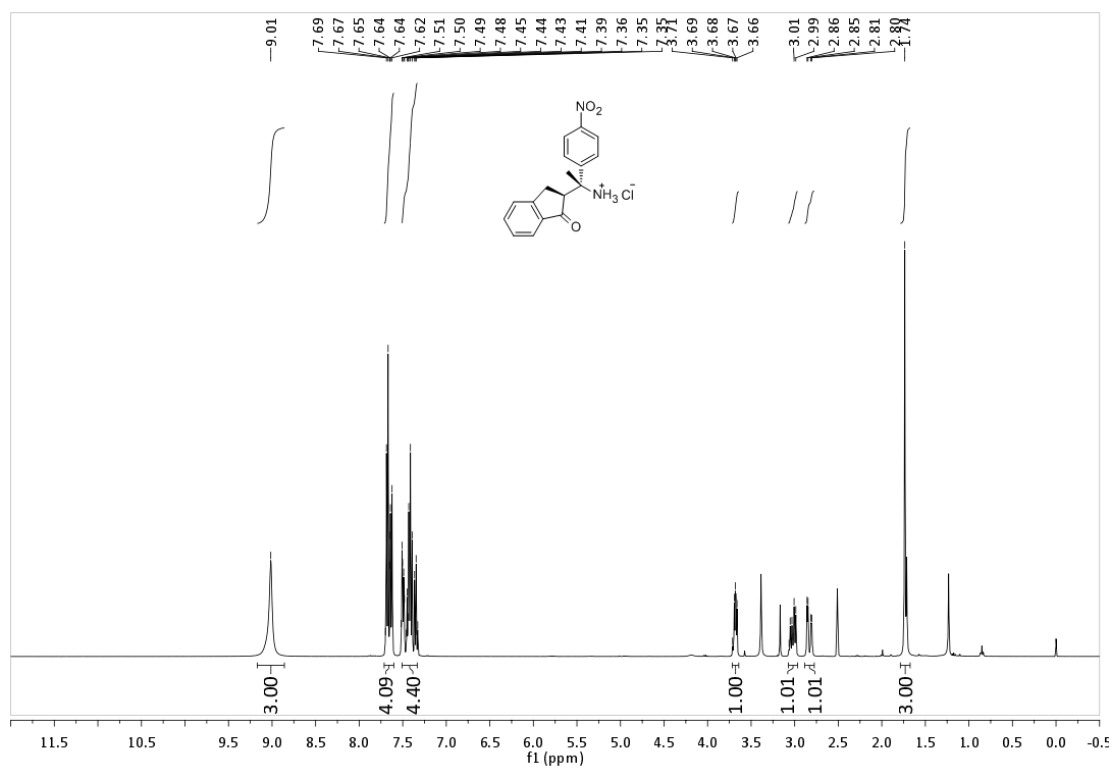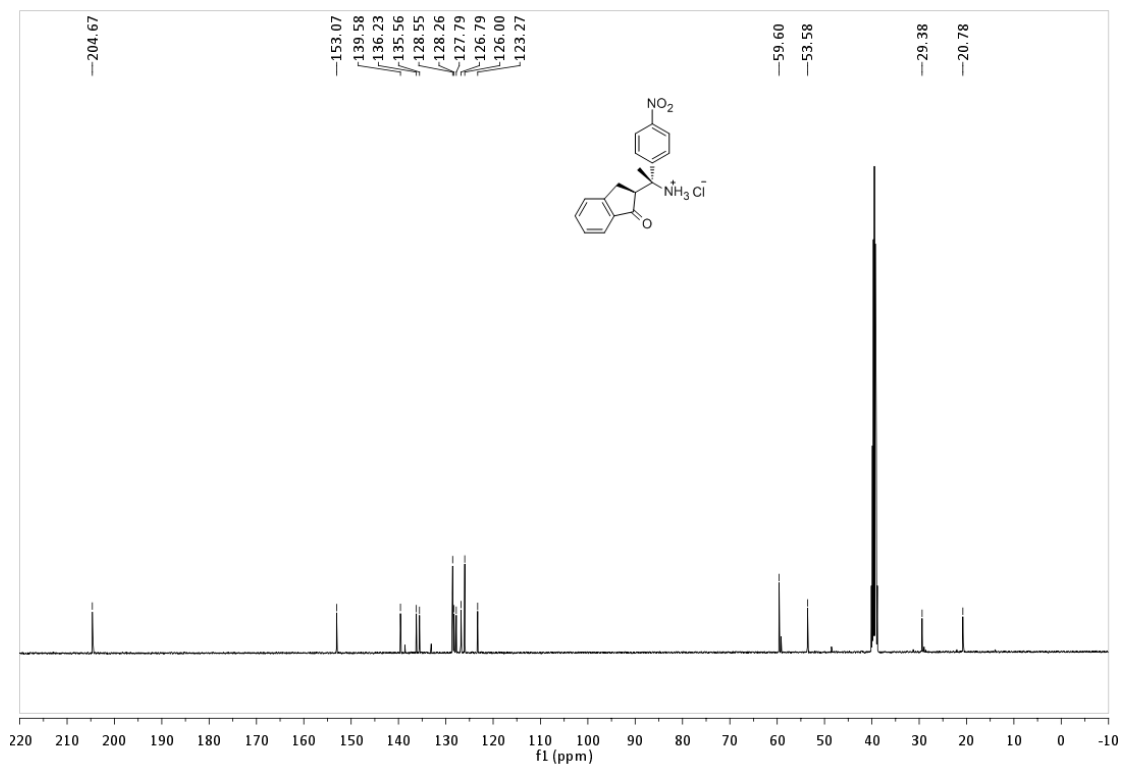

$^1\text{H}$  NMR and  $^{13}\text{C}$  NMR spectrum of **5**

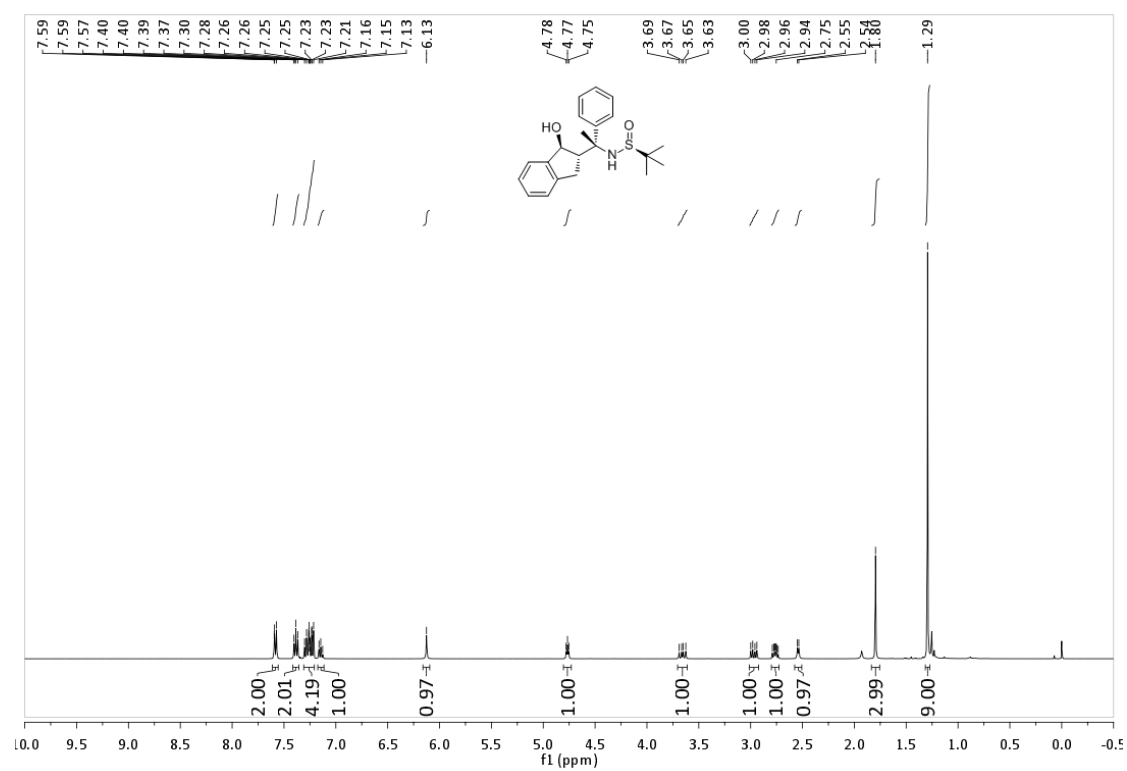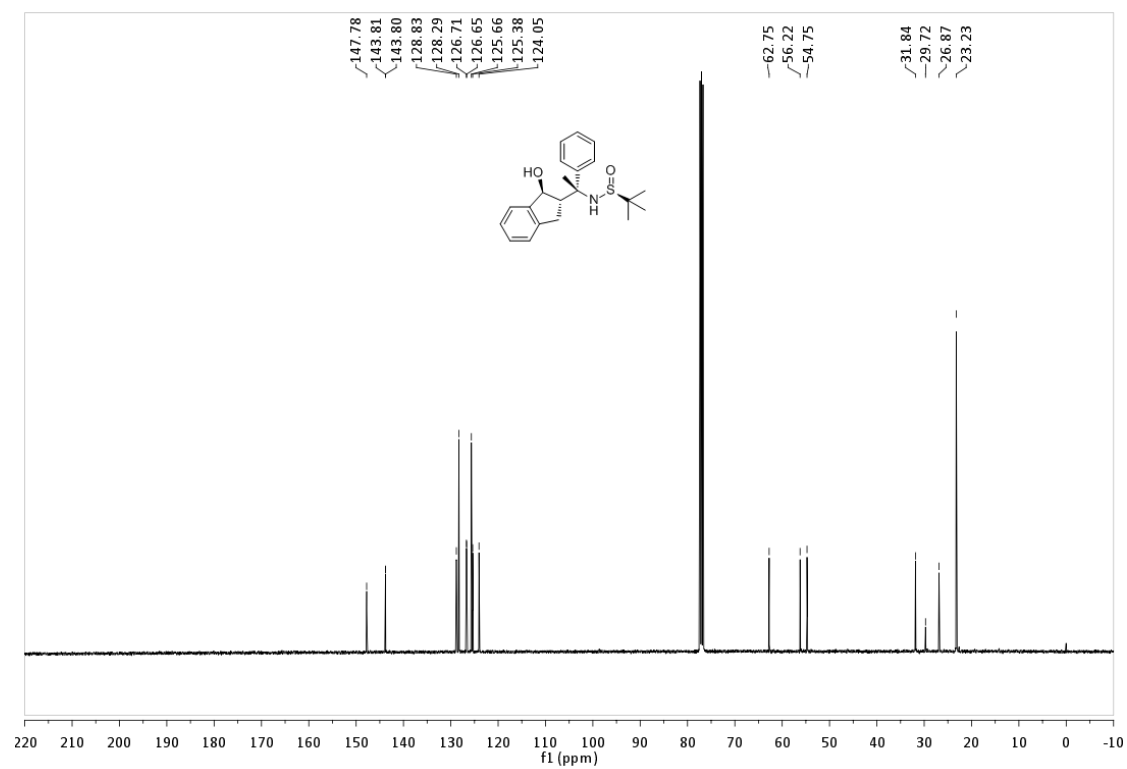

$^1\text{H}$  NMR and  $^{13}\text{C}$  NMR spectrum of **7a**

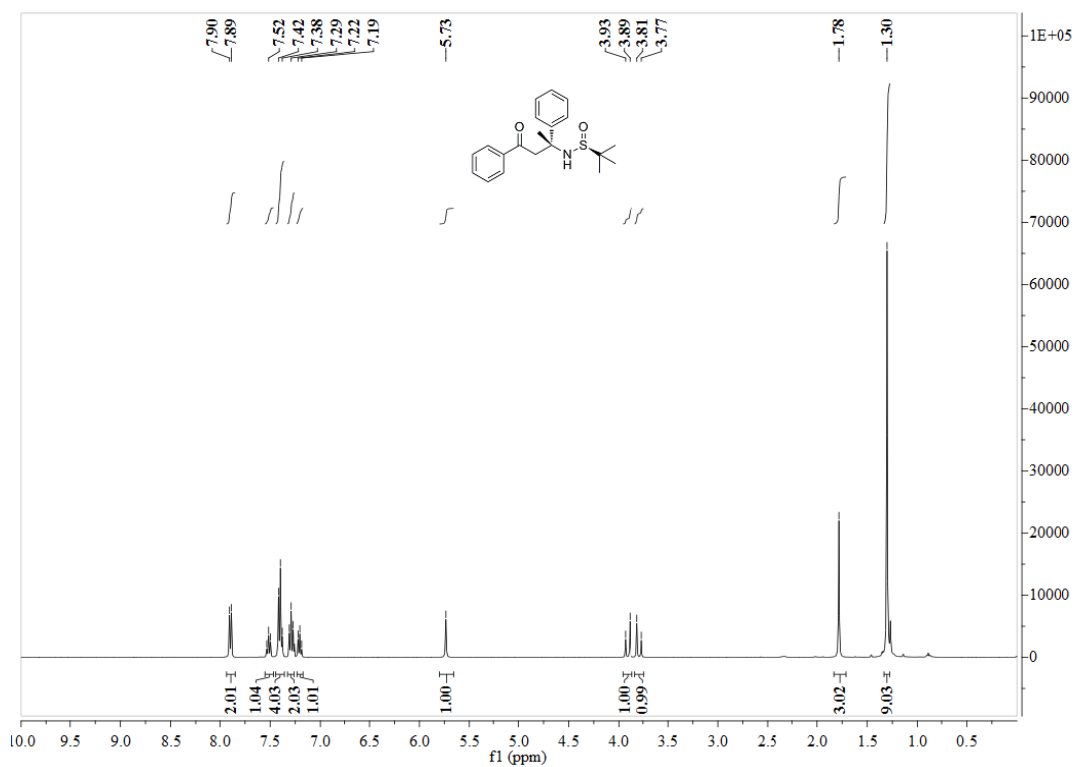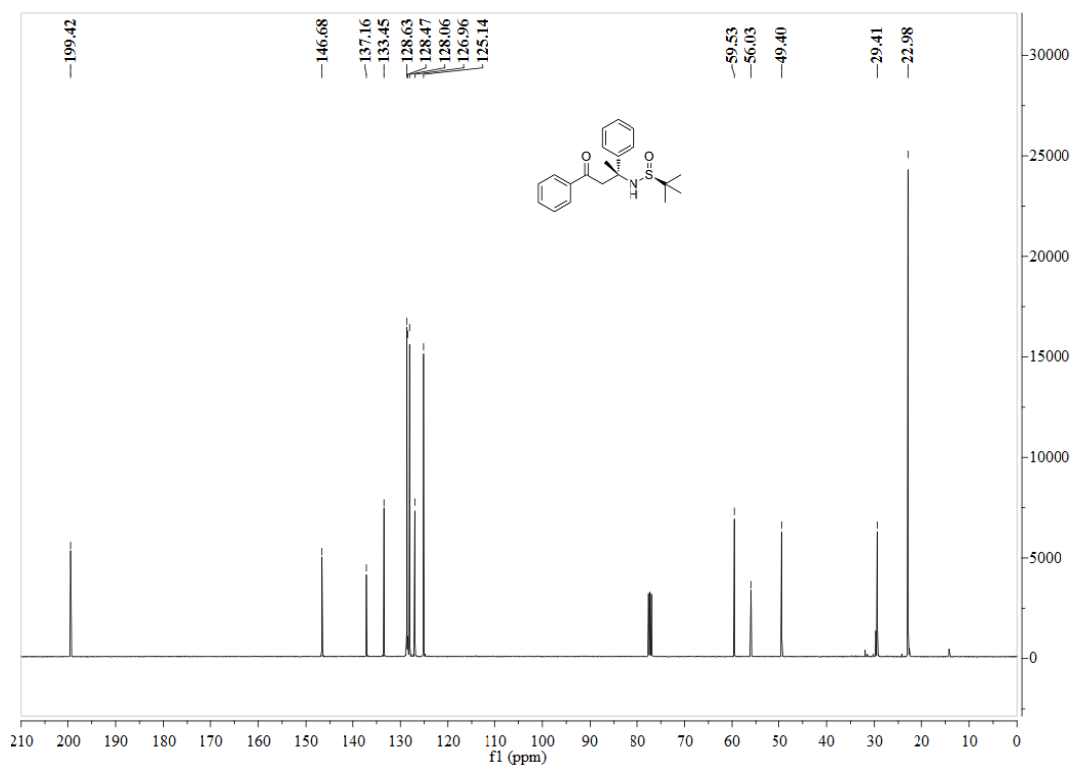



$^1\text{H}$  NMR and  $^{13}\text{C}$  NMR spectrum of **7b**

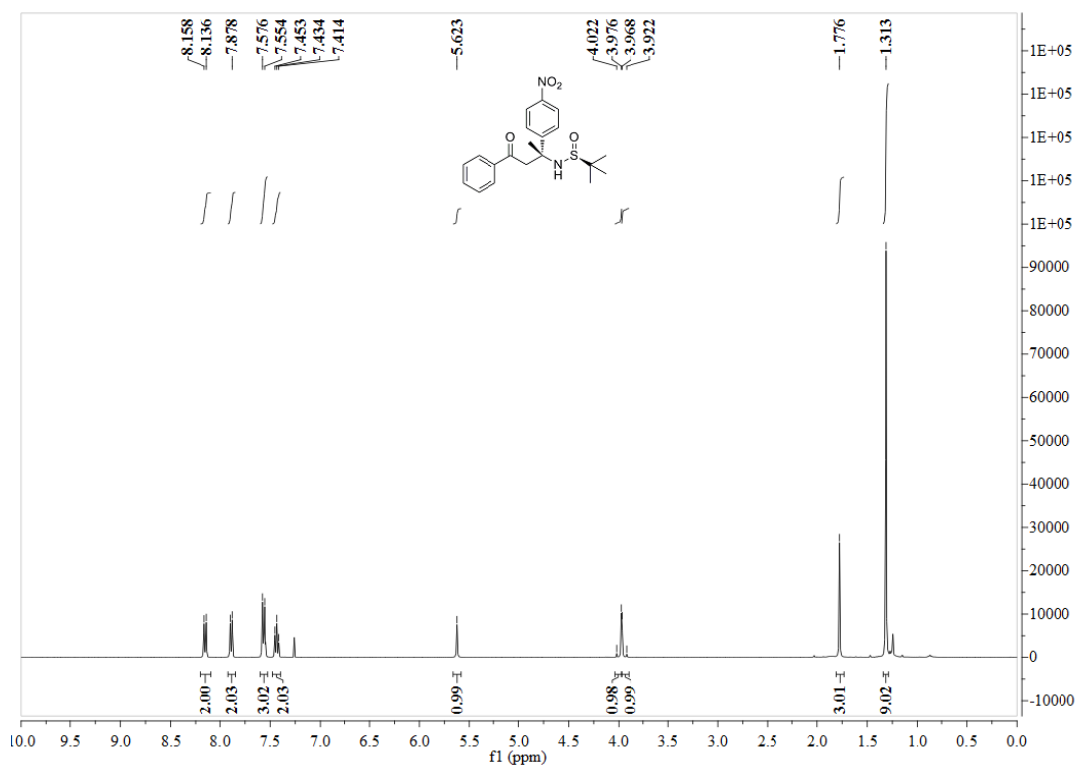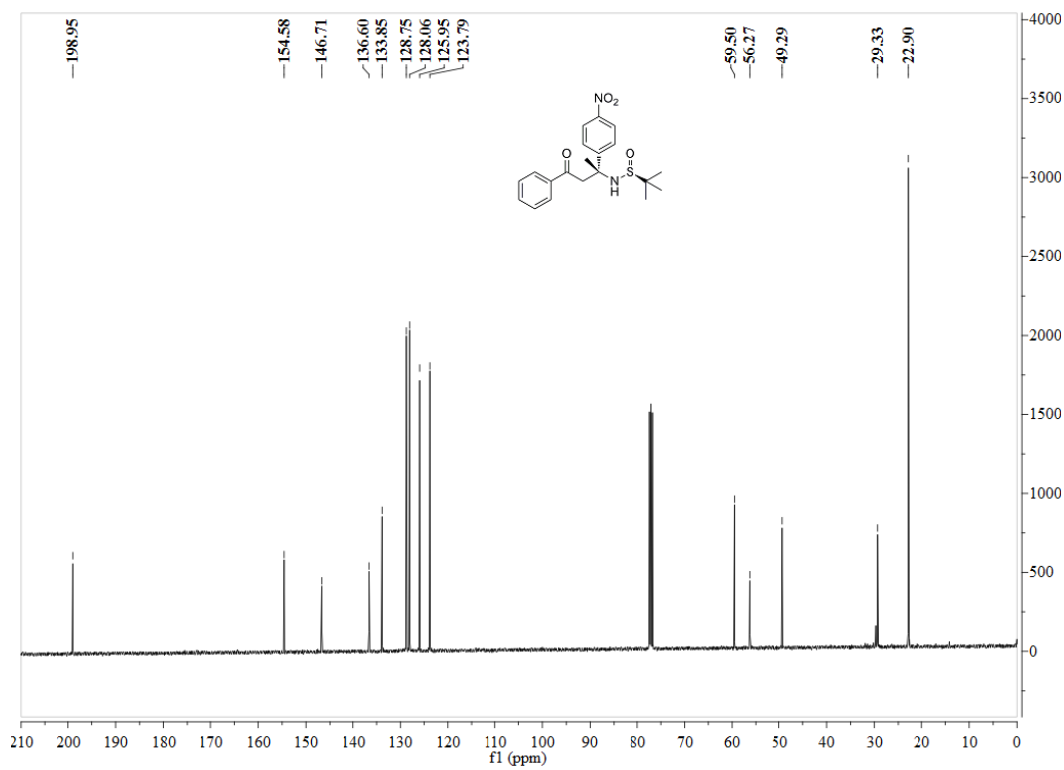

$^1\text{H}$  NMR and  $^{13}\text{C}$  NMR spectrum of 7c

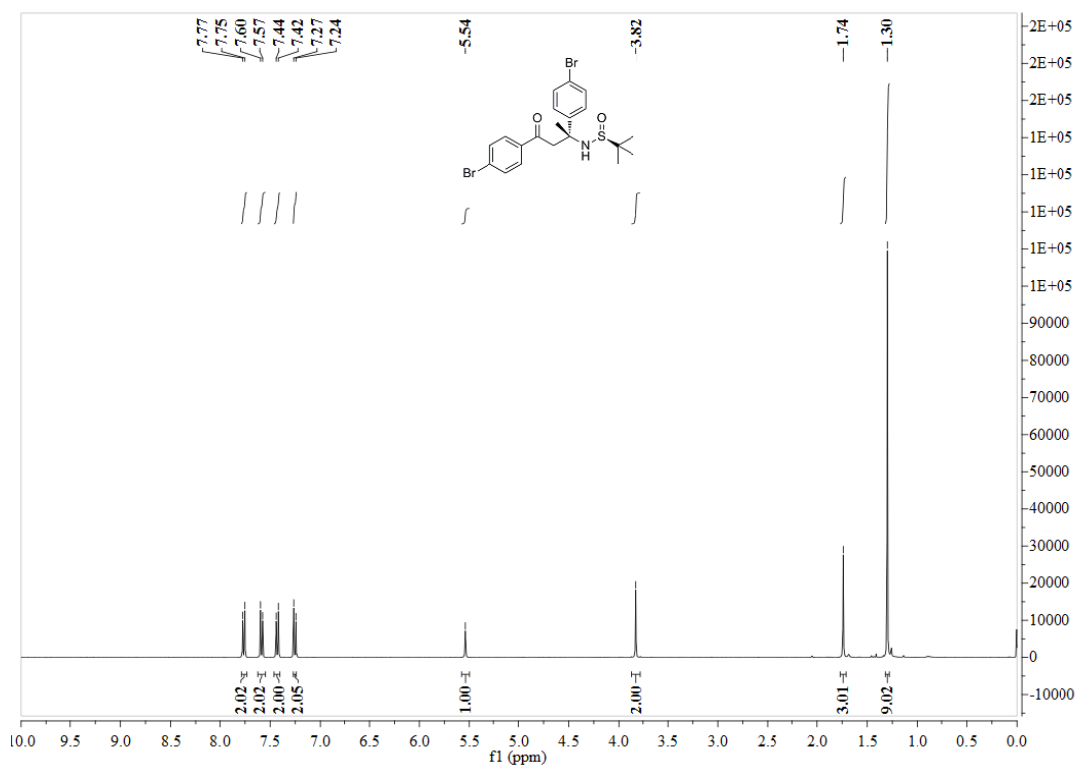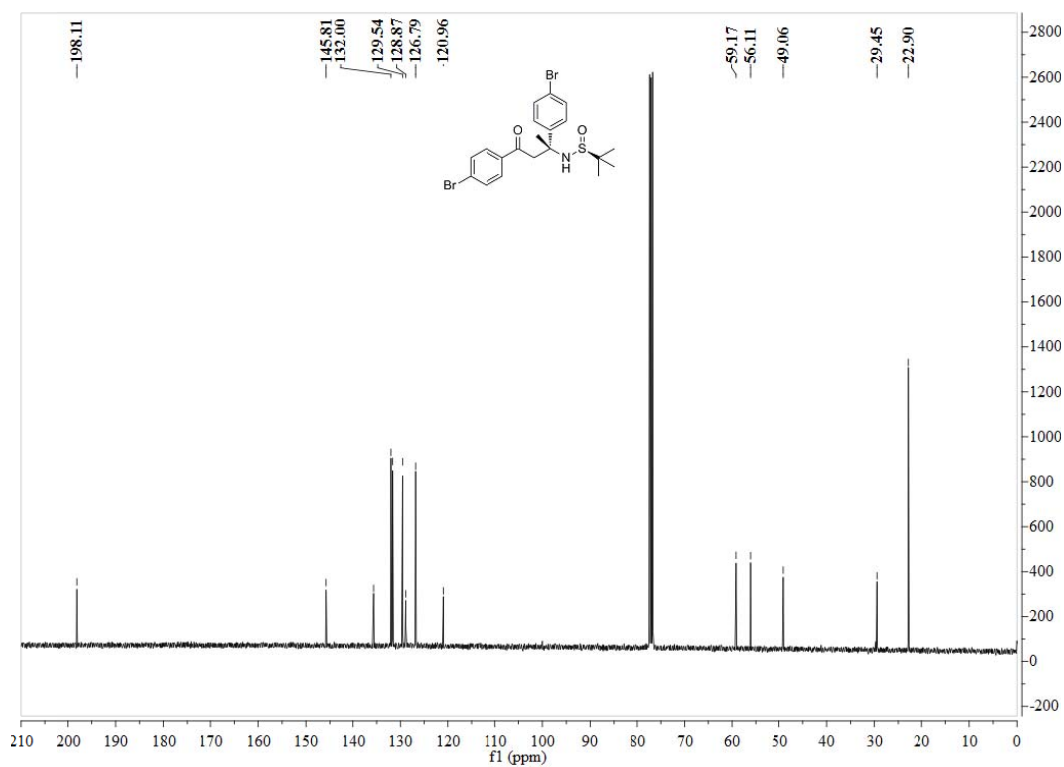

Supplement: c4ob00489b1.pdf [file c4ob00489b1.pdf]
